# Supplementary material
Source: publisher figshare collection journal article supplement (https://rs.figshare.com/ndownloader/files/42507392)
Supplement: Supplementary file 1 [file 42507392]

## Sheet: lifeTableAll
Species	Period	Sex	Ages	lx	px	qx	Lx	Tx	ex
Phoca vitulina	< 1990	Female	0	1	0.669759	0.330241	0.902053	9.0749	9.0749
Phoca vitulina	< 1990	Female	1	0.669759	0.954167	0.0458329	0.658653	8.17285	12.2027
Phoca vitulina	< 1990	Female	2	0.639062	0.872514	0.127486	0.605744	7.5142	11.7582
Phoca vitulina	< 1990	Female	3	0.55759	0.951019	0.0489814	0.545069	6.90845	12.3898
Phoca vitulina	< 1990	Female	4	0.530279	0.961446	0.0385543	0.519305	6.36338	12.0001
Phoca vitulina	< 1990	Female	5	0.509834	0.91595	0.0840505	0.488888	5.84408	11.4627
Phoca vitulina	< 1990	Female	6	0.466982	0.951423	0.0485773	0.449837	5.35519	11.4677
Phoca vitulina	< 1990	Female	7	0.444298	0.919838	0.0801622	0.416706	4.90535	11.0407
Phoca vitulina	< 1990	Female	8	0.408682	0.891387	0.108613	0.385894	4.48865	10.9832
Phoca vitulina	< 1990	Female	9	0.364294	0.817081	0.182919	0.333467	4.10276	11.2622
Phoca vitulina	< 1990	Female	10	0.297657	0.905483	0.0945171	0.285236	3.76929	12.6632
Phoca vitulina	< 1990	Female	11	0.269524	0.934762	0.0652383	0.261107	3.48405	12.9267
Phoca vitulina	< 1990	Female	12	0.25194	0.964286	0.0357143	0.244045	3.22295	12.7925
Phoca vitulina	< 1990	Female	13	0.242942	0.898805	0.101195	0.228351	2.9789	12.2618
Phoca vitulina	< 1990	Female	14	0.218358	0.985714	0.0142857	0.218358	2.75055	12.5965
Phoca vitulina	< 1990	Female	15	0.215239	0.908081	0.0919192	0.207825	2.53219	11.7646
Phoca vitulina	< 1990	Female	16	0.195454	0.963255	0.0367445	0.191154	2.32437	11.8921
Phoca vitulina	< 1990	Female	17	0.188272	0.919565	0.0804348	0.182651	2.13321	11.3305
Phoca vitulina	< 1990	Female	18	0.173128	0.885336	0.114664	0.161913	1.95056	11.2666
Phoca vitulina	< 1990	Female	19	0.153277	0.943627	0.0563725	0.149369	1.78865	11.6694
Phoca vitulina	< 1990	Female	20	0.144636	0.847403	0.152597	0.136665	1.63928	11.3338
Phoca vitulina	< 1990	Female	21	0.122565	0.96	0.04	0.122565	1.50262	12.2597
Phoca vitulina	< 1990	Female	22	0.117663	0.944444	0.0555556	0.117663	1.38005	11.7289
Phoca vitulina	< 1990	Female	23	0.111126	1	0	0.111126	1.26239	11.36
Phoca vitulina	< 1990	Female	24	0.111126	0.9	0.1	0.111126	1.15126	10.36
Phoca vitulina	< 1990	Female	25	0.100013	1	0	0.100013	1.04014	10.4
Phoca vitulina	< 1990	Female	26	0.100013	1	0	0.100013	0.940124	9.4
Phoca vitulina	< 1990	Female	27	0.100013	1	0	0.100013	0.84011	8.4
Phoca vitulina	< 1990	Female	28	0.100013	0.8	0.2	0.100013	0.740097	7.4
Phoca vitulina	< 1990	Female	29	0.0800105	1	0	0.0800105	0.640084	8
Phoca vitulina	< 1990	Female	30	0.0800105	1	0	0.0800105	0.560074	7
Phoca vitulina	< 1990	Female	31	0.0800105	1	0	0.0800105	0.480063	6
Phoca vitulina	< 1990	Female	32	0.0800105	1	0	0.0800105	0.400053	5
Phoca vitulina	< 1990	Female	33	0.0800105	1	0	0.0800105	0.320042	4
Phoca vitulina	< 1990	Female	34	0.0800105	1	0	0.0800105	0.240032	3
Phoca vitulina	< 1990	Female	35	0.0800105	1	0	0.0800105	0.160021	2
Phoca vitulina	< 1990	Female	36	0.0800105	0	1	0.0800105	0.0800105	1
Phoca vitulina	< 1990	Male	0	1	0.729077	0.270923	0.929363	9.09489	9.09489
Phoca vitulina	< 1990	Male	1	0.729077	0.924817	0.0751829	0.708562	8.16552	11.1998
Phoca vitulina	< 1990	Male	2	0.674263	0.861648	0.138352	0.63296	7.45696	11.0594
Phoca vitulina	< 1990	Male	3	0.580977	0.923263	0.0767375	0.558716	6.824	11.7457
Phoca vitulina	< 1990	Male	4	0.536395	0.920904	0.0790961	0.51817	6.26528	11.6804
Phoca vitulina	< 1990	Male	5	0.493968	0.963766	0.036234	0.485435	5.74711	11.6346
Phoca vitulina	< 1990	Male	6	0.47607	0.900965	0.0990351	0.442619	5.26168	11.0523
Phoca vitulina	< 1990	Male	7	0.428922	0.895505	0.104495	0.415967	4.81906	11.2353
Phoca vitulina	< 1990	Male	8	0.384102	0.912217	0.0877834	0.36766	4.40309	11.4633
Phoca vitulina	< 1990	Male	9	0.350384	0.911016	0.0889839	0.333301	4.03543	11.5172
Phoca vitulina	< 1990	Male	10	0.319205	0.901732	0.0982681	0.30622	3.70213	11.598
Phoca vitulina	< 1990	Male	11	0.287838	0.915706	0.0842941	0.277966	3.39591	11.798
Phoca vitulina	< 1990	Male	12	0.263575	0.917775	0.0822254	0.25318	3.11794	11.8295
Phoca vitulina	< 1990	Male	13	0.241902	0.933673	0.0663265	0.231286	2.86476	11.8427
Phoca vitulina	< 1990	Male	14	0.225858	0.942656	0.0573437	0.214857	2.63348	11.6599
Phoca vitulina	< 1990	Male	15	0.212906	1	0	0.212906	2.41862	11.36
Phoca vitulina	< 1990	Male	16	0.212906	0.935181	0.0648194	0.205009	2.20571	10.36
Phoca vitulina	< 1990	Male	17	0.199106	0.95122	0.0487805	0.195819	2.00071	10.0485
Phoca vitulina	< 1990	Male	18	0.189393	0.845802	0.154198	0.176786	1.80489	9.52984
Phoca vitulina	< 1990	Male	19	0.160189	0.954545	0.0454545	0.160189	1.6281	10.1636
Phoca vitulina	< 1990	Male	20	0.152908	1	0	0.152908	1.46791	9.59997
Phoca vitulina	< 1990	Male	21	0.152908	0.947368	0.0526316	0.152908	1.315	8.59997
Phoca vitulina	< 1990	Male	22	0.14486	0.941176	0.0588235	0.14486	1.1621	8.02219
Phoca vitulina	< 1990	Male	23	0.136339	0.933333	0.0666667	0.136339	1.01724	7.46108
Phoca vitulina	< 1990	Male	24	0.12725	0.928571	0.0714286	0.12725	0.880896	6.92258
Phoca vitulina	< 1990	Male	25	0.11816	0.909091	0.0909091	0.11816	0.753647	6.37817
Phoca vitulina	< 1990	Male	26	0.107419	0.875	0.125	0.107419	0.635486	5.91598
Phoca vitulina	< 1990	Male	27	0.0939912	0.714286	0.285714	0.0748957	0.528068	5.61827
Phoca vitulina	< 1990	Male	28	0.0671366	1	0	0.0671366	0.453172	6.75
Phoca vitulina	< 1990	Male	29	0.0671366	1	0	0.0671366	0.386035	5.75
Phoca vitulina	< 1990	Male	30	0.0671366	0.75	0.25	0.0671366	0.318899	4.75
Phoca vitulina	< 1990	Male	31	0.0503524	1	0	0.0503524	0.251762	5
Phoca vitulina	< 1990	Male	32	0.0503524	0.5	0.5	0.0503524	0.20141	4
Phoca vitulina	< 1990	Male	33	0.0251762	1	0	0.0251762	0.151057	6
Phoca vitulina	< 1990	Male	34	0.0251762	1	0	0.0251762	0.125881	5
Phoca vitulina	< 1990	Male	35	0.0251762	1	0	0.0251762	0.100705	4
Phoca vitulina	< 1990	Male	36	0.0251762	1	0	0.0251762	0.0755287	3
Phoca vitulina	< 1990	Male	37	0.0251762	1	0	0.0251762	0.0503524	2
Phoca vitulina	< 1990	Male	38	0.0251762	0	1	0.0251762	0.0251762	1
Phoca vitulina	1990-2004	Female	0	1	0.815695	0.184305	0.95226	16.1356	16.1356
Phoca vitulina	1990-2004	Female	1	0.815695	0.953416	0.0465842	0.796045	15.1834	18.614
Phoca vitulina	1990-2004	Female	2	0.777697	0.973941	0.0260589	0.761416	14.3873	18.4999
Phoca vitulina	1990-2004	Female	3	0.757431	0.97389	0.0261104	0.751639	13.6259	17.9897
Phoca vitulina	1990-2004	Female	4	0.737654	0.929127	0.0708734	0.704978	12.8743	17.453
Phoca vitulina	1990-2004	Female	5	0.685374	0.986486	0.0135135	0.677548	12.1693	17.7557
Phoca vitulina	1990-2004	Female	6	0.676112	0.972585	0.027415	0.66842	11.4918	16.9968
Phoca vitulina	1990-2004	Female	7	0.657576	0.98513	0.0148697	0.650341	10.8233	16.4594
Phoca vitulina	1990-2004	Female	8	0.647798	0.939513	0.0604866	0.626885	10.173	15.704
Phoca vitulina	1990-2004	Female	9	0.608615	0.952387	0.0476129	0.597989	9.54611	15.685
Phoca vitulina	1990-2004	Female	10	0.579637	0.958951	0.0410491	0.573975	8.94813	15.4375
Phoca vitulina	1990-2004	Female	11	0.555844	0.991525	0.00847458	0.555844	8.37415	15.0657
Phoca vitulina	1990-2004	Female	12	0.551133	0.975475	0.0245246	0.547077	7.81831	14.1859
Phoca vitulina	1990-2004	Female	13	0.537617	0.973805	0.026195	0.533247	7.27123	13.5249
Phoca vitulina	1990-2004	Female	14	0.523534	0.980354	0.019646	0.516694	6.73798	12.8702
Phoca vitulina	1990-2004	Female	15	0.513249	0.942731	0.0572691	0.497334	6.22129	12.1214
Phoca vitulina	1990-2004	Female	16	0.483855	0.973324	0.0266763	0.474885	5.72395	11.8299
Phoca vitulina	1990-2004	Female	17	0.470948	0.911404	0.0885961	0.447636	5.24907	11.1458
Phoca vitulina	1990-2004	Female	18	0.429224	0.914409	0.0855911	0.40702	4.80143	11.1863
Phoca vitulina	1990-2004	Female	19	0.392486	0.963306	0.0366941	0.385187	4.39441	11.1964
Phoca vitulina	1990-2004	Female	20	0.378084	0.943285	0.0567147	0.366161	4.00923	10.6041
Phoca vitulina	1990-2004	Female	21	0.356641	0.91651	0.0834898	0.333697	3.64307	10.2149
Phoca vitulina	1990-2004	Female	22	0.326865	0.95122	0.0487805	0.325239	3.30937	10.1246
Phoca vitulina	1990-2004	Female	23	0.310921	1	0	0.310921	2.98413	9.59772
Phoca vitulina	1990-2004	Female	24	0.310921	0.97561	0.0243902	0.310921	2.67321	8.59772
Phoca vitulina	1990-2004	Female	25	0.303337	0.949375	0.0506246	0.297117	2.36229	7.78766
Phoca vitulina	1990-2004	Female	26	0.287981	1	0	0.287981	2.06517	7.17121
Phoca vitulina	1990-2004	Female	27	0.287981	0.857771	0.142229	0.274537	1.77719	6.17121
Phoca vitulina	1990-2004	Female	28	0.247022	0.85	0.15	0.214901	1.50265	6.08308
Phoca vitulina	1990-2004	Female	29	0.209968	0.947368	0.0526316	0.209968	1.28775	6.13307
Phoca vitulina	1990-2004	Female	30	0.198918	1	0	0.198918	1.07778	5.41824
Phoca vitulina	1990-2004	Female	31	0.198918	0.815686	0.184314	0.167332	0.878865	4.41824
Phoca vitulina	1990-2004	Female	32	0.162254	0.846154	0.153846	0.145312	0.711534	4.3853
Phoca vitulina	1990-2004	Female	33	0.137292	0.888889	0.111111	0.137292	0.566221	4.12421
Phoca vitulina	1990-2004	Female	34	0.122037	0.875	0.125	0.122037	0.428929	3.51473
Phoca vitulina	1990-2004	Female	35	0.106783	0.8	0.2	0.106783	0.306892	2.87398
Phoca vitulina	1990-2004	Female	36	0.0854262	0.5	0.5	0.0719697	0.200109	2.34248
Phoca vitulina	1990-2004	Female	37	0.0427131	1	0	0.0427131	0.128139	3
Phoca vitulina	1990-2004	Female	38	0.0427131	1	0	0.0427131	0.0854262	2
Phoca vitulina	1990-2004	Female	39	0.0427131	0	1	0.0427131	0.0427131	1
Phoca vitulina	1990-2004	Male	0	1	0.709472	0.290528	0.962353	12.3461	12.3461
Phoca vitulina	1990-2004	Male	1	0.709472	0.943914	0.0560864	0.69481	11.3838	16.0454
Phoca vitulina	1990-2004	Male	2	0.66968	0.93563	0.0643699	0.644247	10.689	15.9613
Phoca vitulina	1990-2004	Male	3	0.626573	0.965589	0.034411	0.621399	10.0447	16.0312
Phoca vitulina	1990-2004	Male	4	0.605012	0.939589	0.0604105	0.589104	9.42334	15.5754
Phoca vitulina	1990-2004	Male	5	0.568463	0.965217	0.0347826	0.557242	8.83423	15.5406
Phoca vitulina	1990-2004	Male	6	0.54869	0.936413	0.0635868	0.530397	8.27699	15.085
Phoca vitulina	1990-2004	Male	7	0.513801	0.943316	0.0566841	0.501462	7.74659	15.077
Phoca vitulina	1990-2004	Male	8	0.484677	0.959437	0.0405634	0.476885	7.24513	14.9484
Phoca vitulina	1990-2004	Male	9	0.465017	0.967856	0.0321437	0.460333	6.76825	14.5548
Phoca vitulina	1990-2004	Male	10	0.450069	0.977901	0.0220988	0.441665	6.30791	14.0154
Phoca vitulina	1990-2004	Male	11	0.440123	0.966789	0.0332113	0.432128	5.86625	13.3286
Phoca vitulina	1990-2004	Male	12	0.425506	0.954287	0.0457128	0.416573	5.43412	12.771
Phoca vitulina	1990-2004	Male	13	0.406055	0.940319	0.0596808	0.395712	5.01755	12.3568
Phoca vitulina	1990-2004	Male	14	0.381821	0.975152	0.0248476	0.378529	4.62184	12.1047
Phoca vitulina	1990-2004	Male	15	0.372334	0.944375	0.0556247	0.366115	4.24331	11.3965
Phoca vitulina	1990-2004	Male	16	0.351623	0.952563	0.0474369	0.343477	3.87719	11.0266
Phoca vitulina	1990-2004	Male	17	0.334943	0.945614	0.054386	0.32875	3.53371	10.5502
Phoca vitulina	1990-2004	Male	18	0.316727	0.941176	0.0588235	0.304588	3.20496	10.119
Phoca vitulina	1990-2004	Male	19	0.298096	0.98	0.02	0.298096	2.90038	9.72967
Phoca vitulina	1990-2004	Male	20	0.292134	0.955511	0.0444894	0.289504	2.60228	8.90783
Phoca vitulina	1990-2004	Male	21	0.279137	1	0	0.279137	2.31278	8.28545
Phoca vitulina	1990-2004	Male	22	0.279137	0.906057	0.0939428	0.271042	2.03364	7.28545
Phoca vitulina	1990-2004	Male	23	0.252914	0.925926	0.0740741	0.243811	1.7626	6.96915
Phoca vitulina	1990-2004	Male	24	0.23418	0.843088	0.156912	0.210854	1.51879	6.48555
Phoca vitulina	1990-2004	Male	25	0.197434	1	0	0.197434	1.30793	6.62464
Phoca vitulina	1990-2004	Male	26	0.197434	0.756865	0.243135	0.178026	1.1105	5.62464
Phoca vitulina	1990-2004	Male	27	0.149431	0.785714	0.214286	0.143706	0.932471	6.24014
Phoca vitulina	1990-2004	Male	28	0.11741	0.923077	0.0769231	0.11741	0.788765	6.71803
Phoca vitulina	1990-2004	Male	29	0.108379	1	0	0.108379	0.671355	6.19454
Phoca vitulina	1990-2004	Male	30	0.108379	1	0	0.108379	0.562977	5.19454
Phoca vitulina	1990-2004	Male	31	0.108379	0.818182	0.181818	0.0916882	0.454598	4.19454
Phoca vitulina	1990-2004	Male	32	0.0886734	0.777778	0.222222	0.0826519	0.36291	4.09266
Phoca vitulina	1990-2004	Male	33	0.0689682	0.714286	0.285714	0.066785	0.280258	4.06358
Phoca vitulina	1990-2004	Male	34	0.049263	1	0	0.049263	0.213473	4.33333
Phoca vitulina	1990-2004	Male	35	0.049263	0.666667	0.333333	0.049263	0.16421	3.33333
Phoca vitulina	1990-2004	Male	36	0.032842	1	0	0.032842	0.114947	3.5
Phoca vitulina	1990-2004	Male	37	0.032842	0.5	0.5	0.032842	0.082105	2.5
Phoca vitulina	1990-2004	Male	38	0.016421	1	0	0.016421	0.049263	3
Phoca vitulina	1990-2004	Male	39	0.016421	1	0	0.016421	0.032842	2
Phoca vitulina	1990-2004	Male	40	0.016421	0	1	0.016421	0.016421	1
Phoca vitulina	2005-2020	Female	0	1	0.87431	0.12569	0.982781	19.5228	19.5228
Phoca vitulina	2005-2020	Female	1	0.87431	0.974358	0.0256421	0.870695	18.54	21.2053
Phoca vitulina	2005-2020	Female	2	0.851891	0.969986	0.0300136	0.84215	17.6693	20.7413
Phoca vitulina	2005-2020	Female	3	0.826323	0.9527	0.0473	0.810835	16.8272	20.3639
Phoca vitulina	2005-2020	Female	4	0.787238	0.973681	0.0263192	0.779106	16.0163	20.345
Phoca vitulina	2005-2020	Female	5	0.766518	0.979879	0.0201214	0.760966	15.2372	19.8785
Phoca vitulina	2005-2020	Female	6	0.751095	0.978256	0.0217437	0.737485	14.4763	19.2735
Phoca vitulina	2005-2020	Female	7	0.734763	0.955115	0.0448849	0.718493	13.7388	18.6982
Phoca vitulina	2005-2020	Female	8	0.701784	0.968688	0.031312	0.692444	13.0203	18.5531
Phoca vitulina	2005-2020	Female	9	0.679809	0.967536	0.032464	0.6688	12.3278	18.1343
Phoca vitulina	2005-2020	Female	10	0.65774	0.974861	0.0251389	0.651872	11.659	17.7259
Phoca vitulina	2005-2020	Female	11	0.641205	0.97507	0.02493	0.626925	11.0072	17.1664
Phoca vitulina	2005-2020	Female	12	0.62522	0.991736	0.00826446	0.62522	10.3802	16.6026
Phoca vitulina	2005-2020	Female	13	0.620053	0.991803	0.00819672	0.620053	9.75502	15.7326
Phoca vitulina	2005-2020	Female	14	0.61497	0.982743	0.0172569	0.607223	9.13497	14.8543
Phoca vitulina	2005-2020	Female	15	0.604358	0.938053	0.0619469	0.581577	8.52775	14.1104
Phoca vitulina	2005-2020	Female	16	0.56692	0.972891	0.0271089	0.559229	7.94617	14.0164
Phoca vitulina	2005-2020	Female	17	0.551551	0.981396	0.0186042	0.548114	7.38694	13.393
Phoca vitulina	2005-2020	Female	18	0.54129	0.962531	0.0374689	0.528445	6.83883	12.6343
Phoca vitulina	2005-2020	Female	19	0.521009	0.990196	0.00980392	0.519117	6.31038	12.1119
Phoca vitulina	2005-2020	Female	20	0.515901	0.96	0.04	0.504864	5.79127	11.2255
Phoca vitulina	2005-2020	Female	21	0.495265	0.978815	0.021185	0.491651	5.2864	10.6739
Phoca vitulina	2005-2020	Female	22	0.484772	0.966516	0.0334842	0.479495	4.79475	9.89073
Phoca vitulina	2005-2020	Female	23	0.46854	0.964002	0.0359976	0.456876	4.31526	9.21
Phoca vitulina	2005-2020	Female	24	0.451674	0.949025	0.050975	0.443267	3.85838	8.5424
Phoca vitulina	2005-2020	Female	25	0.42865	0.892314	0.107686	0.399074	3.41511	7.96714
Phoca vitulina	2005-2020	Female	26	0.38249	0.90948	0.0905203	0.361452	3.01604	7.88528
Phoca vitulina	2005-2020	Female	27	0.347867	0.948276	0.0517241	0.343599	2.65459	7.63104
Phoca vitulina	2005-2020	Female	28	0.329874	0.925926	0.0740741	0.321993	2.31099	7.00567
Phoca vitulina	2005-2020	Female	29	0.305439	0.936346	0.063654	0.296948	1.98899	6.51193
Phoca vitulina	2005-2020	Female	30	0.285996	0.901758	0.0982424	0.268139	1.69205	5.91632
Phoca vitulina	2005-2020	Female	31	0.257899	0.855953	0.144047	0.237891	1.42391	5.52118
Phoca vitulina	2005-2020	Female	32	0.22075	0.925926	0.0740741	0.211323	1.18602	5.37268
Phoca vitulina	2005-2020	Female	33	0.204398	0.956522	0.0434783	0.204398	0.974694	4.76861
Phoca vitulina	2005-2020	Female	34	0.195511	0.856639	0.143361	0.187874	0.770296	3.93991
Phoca vitulina	2005-2020	Female	35	0.167482	0.6875	0.3125	0.143141	0.582422	3.47751
Phoca vitulina	2005-2020	Female	36	0.115144	0.8	0.2	0.105363	0.439281	3.81506
Phoca vitulina	2005-2020	Female	37	0.0921153	0.875	0.125	0.0921153	0.333918	3.625
Phoca vitulina	2005-2020	Female	38	0.0806009	0.8	0.2	0.0806009	0.241803	3
Phoca vitulina	2005-2020	Female	39	0.0644807	0.75	0.25	0.0644807	0.161202	2.5
Phoca vitulina	2005-2020	Female	40	0.0483605	1	0	0.0483605	0.0967211	2
Phoca vitulina	2005-2020	Female	41	0.0483605	0	1	0.0483605	0.0483605	1
Phoca vitulina	2005-2020	Male	0	1	0.846333	0.153667	0.961713	17.2882	17.2882
Phoca vitulina	2005-2020	Male	1	0.846333	0.921746	0.0782543	0.81093	16.3265	19.2909
Phoca vitulina	2005-2020	Male	2	0.780103	0.961371	0.0386291	0.765539	15.5156	19.8891
Phoca vitulina	2005-2020	Male	3	0.749969	0.99187	0.00813008	0.749969	14.75	19.6675
Phoca vitulina	2005-2020	Male	4	0.743871	0.976246	0.0237542	0.737598	14.0001	18.8206
Phoca vitulina	2005-2020	Male	5	0.726201	0.974929	0.0250712	0.721138	13.2625	18.2628
Phoca vitulina	2005-2020	Male	6	0.707995	0.982374	0.0176263	0.70422	12.5413	17.7139
Phoca vitulina	2005-2020	Male	7	0.695515	0.935849	0.0641511	0.671228	11.8371	17.0192
Phoca vitulina	2005-2020	Male	8	0.650897	0.97078	0.0292195	0.642902	11.1659	17.1546
Phoca vitulina	2005-2020	Male	9	0.631878	0.97133	0.0286702	0.623607	10.523	16.6535
Phoca vitulina	2005-2020	Male	10	0.613762	0.980198	0.019802	0.60878	9.89938	16.129
Phoca vitulina	2005-2020	Male	11	0.601608	0.99	0.01	0.601608	9.2906	15.4429
Phoca vitulina	2005-2020	Male	12	0.595592	0.980488	0.0195117	0.594071	8.68899	14.5888
Phoca vitulina	2005-2020	Male	13	0.583971	0.969658	0.0303417	0.580105	8.09492	13.8618
Phoca vitulina	2005-2020	Male	14	0.566253	0.933084	0.0669162	0.552392	7.51482	13.2711
Phoca vitulina	2005-2020	Male	15	0.528361	0.953762	0.046238	0.522747	6.96242	13.1774
Phoca vitulina	2005-2020	Male	16	0.503931	0.942115	0.0578855	0.493285	6.43968	12.7789
Phoca vitulina	2005-2020	Male	17	0.474761	0.9875	0.0125	0.474761	5.94639	12.525
Phoca vitulina	2005-2020	Male	18	0.468826	0.974523	0.0254767	0.461898	5.47163	11.6709
Phoca vitulina	2005-2020	Male	19	0.456882	0.934885	0.0651154	0.448045	5.00973	10.9651
Phoca vitulina	2005-2020	Male	20	0.427132	0.985075	0.0149254	0.427132	4.56169	10.6798
Phoca vitulina	2005-2020	Male	21	0.420757	0.953365	0.0466348	0.407105	4.13456	9.82648
Phoca vitulina	2005-2020	Male	22	0.401135	0.966935	0.0330647	0.393341	3.72745	9.29227
Phoca vitulina	2005-2020	Male	23	0.387871	0.94887	0.0511296	0.378418	3.33411	8.59592
Phoca vitulina	2005-2020	Male	24	0.36804	0.945378	0.0546218	0.35973	2.95569	8.03091
Phoca vitulina	2005-2020	Male	25	0.347937	0.979592	0.0204082	0.347937	2.59596	7.46102
Phoca vitulina	2005-2020	Male	26	0.340836	0.918367	0.0816327	0.332315	2.24803	6.59562
Phoca vitulina	2005-2020	Male	27	0.313013	0.93135	0.0686499	0.307357	1.91571	6.12024
Phoca vitulina	2005-2020	Male	28	0.291524	0.90625	0.09375	0.270095	1.60835	5.51705
Phoca vitulina	2005-2020	Male	29	0.264194	0.89893	0.10107	0.249595	1.33826	5.06544
Phoca vitulina	2005-2020	Male	30	0.237492	0.924444	0.0755556	0.23015	1.08866	4.58401
Phoca vitulina	2005-2020	Male	31	0.219548	0.681818	0.318182	0.1755	0.858515	3.91038
Phoca vitulina	2005-2020	Male	32	0.149692	0.916667	0.0833333	0.149692	0.683015	4.56281
Phoca vitulina	2005-2020	Male	33	0.137217	0.8	0.2	0.121671	0.533324	3.8867
Phoca vitulina	2005-2020	Male	34	0.109774	0.75	0.25	0.109774	0.411652	3.75
Phoca vitulina	2005-2020	Male	35	0.0823305	0.666667	0.333333	0.0823305	0.301878	3.66667
Phoca vitulina	2005-2020	Male	36	0.054887	1	0	0.054887	0.219548	4
Phoca vitulina	2005-2020	Male	37	0.054887	1	0	0.054887	0.164661	3
Phoca vitulina	2005-2020	Male	38	0.054887	1	0	0.054887	0.109774	2
Phoca vitulina	2005-2020	Male	39	0.054887	0	1	0.054887	0.054887	1
Zalophus californianus	< 1975	Female	0	1	0.500366	0.499634	0.817628	3.80698	3.80698
Zalophus californianus	< 1975	Female	1	0.500366	0.779368	0.220632	0.440081	2.98935	5.97433
Zalophus californianus	< 1975	Female	2	0.389969	0.780784	0.219216	0.35177	2.54927	6.5371
Zalophus californianus	< 1975	Female	3	0.304482	0.89033	0.10967	0.289035	2.1975	7.21718
Zalophus californianus	< 1975	Female	4	0.271089	0.864045	0.135955	0.254646	1.90846	7.03998
Zalophus californianus	< 1975	Female	5	0.234233	0.905535	0.0944654	0.226873	1.65382	7.06056
Zalophus californianus	< 1975	Female	6	0.212106	0.843219	0.156781	0.187297	1.42694	6.7275
Zalophus californianus	< 1975	Female	7	0.178852	0.935229	0.0647708	0.172608	1.23965	6.93113
Zalophus californianus	< 1975	Female	8	0.167268	0.9122	0.0878001	0.160229	1.06704	6.37923
Zalophus californianus	< 1975	Female	9	0.152582	0.867426	0.132574	0.140535	0.906811	5.94312
Zalophus californianus	< 1975	Female	10	0.132353	0.853165	0.146835	0.121244	0.766276	5.78963
Zalophus californianus	< 1975	Female	11	0.112919	0.866133	0.133867	0.104741	0.645032	5.71234
Zalophus californianus	< 1975	Female	12	0.0978029	0.838839	0.161161	0.0899124	0.540291	5.52429
Zalophus californianus	< 1975	Female	13	0.0820409	0.906828	0.0931721	0.0806873	0.450379	5.48969
Zalophus californianus	< 1975	Female	14	0.0743969	0.940508	0.059492	0.0721	0.369692	4.96918
Zalophus californianus	< 1975	Female	15	0.0699709	0.855056	0.144944	0.0653099	0.297592	4.25308
Zalophus californianus	< 1975	Female	16	0.0598291	0.875	0.125	0.0560725	0.232282	3.88242
Zalophus californianus	< 1975	Female	17	0.0523504	0.831403	0.168597	0.047444	0.176209	3.36596
Zalophus californianus	< 1975	Female	18	0.0435243	0.723231	0.276769	0.0376588	0.128765	2.95847
Zalophus californianus	< 1975	Female	19	0.0314781	0.774327	0.225673	0.0269854	0.0911065	2.89428
Zalophus californianus	< 1975	Female	20	0.0243744	0.690196	0.309804	0.0193576	0.0641211	2.63068
Zalophus californianus	< 1975	Female	21	0.0168231	0.818182	0.181818	0.0159704	0.0447635	2.66084
Zalophus californianus	< 1975	Female	22	0.0137644	0.777778	0.222222	0.0125957	0.0287931	2.09186
Zalophus californianus	< 1975	Female	23	0.0107056	0.333333	0.666667	0.00906037	0.0161974	1.51299
Zalophus californianus	< 1975	Female	24	0.00356854	1	0	0.00356854	0.00713707	2
Zalophus californianus	< 1975	Female	25	0.00356854	0	1	0.00356854	0.00356854	1
Zalophus californianus	< 1975	Male	0	1	0.621512	0.378488	0.864772	3.93669	3.93669
Zalophus californianus	< 1975	Male	1	0.621512	0.841371	0.158629	0.576547	3.07192	4.94266
Zalophus californianus	< 1975	Male	2	0.522922	0.704225	0.295775	0.448843	2.49537	4.77198
Zalophus californianus	< 1975	Male	3	0.368254	0.800789	0.199211	0.328859	2.04653	5.55738
Zalophus californianus	< 1975	Male	4	0.294894	0.830737	0.169263	0.266587	1.71767	5.82471
Zalophus californianus	< 1975	Male	5	0.244979	0.808084	0.191916	0.229258	1.45108	5.92329
Zalophus californianus	< 1975	Male	6	0.197964	0.799756	0.200244	0.173754	1.22183	6.17196
Zalophus californianus	< 1975	Male	7	0.158323	0.919828	0.0801719	0.153404	1.04807	6.61984
Zalophus californianus	< 1975	Male	8	0.14563	0.855865	0.144135	0.135049	0.894668	6.14344
Zalophus californianus	< 1975	Male	9	0.124639	0.859431	0.140569	0.116305	0.759619	6.09453
Zalophus californianus	< 1975	Male	10	0.107119	0.846276	0.153724	0.0984613	0.643314	6.0056
Zalophus californianus	< 1975	Male	11	0.0906523	0.870748	0.129252	0.0864006	0.544853	6.01036
Zalophus californianus	< 1975	Male	12	0.0789354	0.86277	0.13723	0.0752789	0.458453	5.80795
Zalophus californianus	< 1975	Male	13	0.0681031	0.836735	0.163265	0.0616274	0.383174	5.62638
Zalophus californianus	< 1975	Male	14	0.0569842	0.873529	0.126471	0.0546267	0.321546	5.64272
Zalophus californianus	< 1975	Male	15	0.0497774	0.904018	0.0959821	0.0479128	0.266919	5.36226
Zalophus californianus	< 1975	Male	16	0.0449996	0.887574	0.112426	0.0417072	0.219007	4.86685
Zalophus californianus	< 1975	Male	17	0.0399405	0.859091	0.140909	0.0361957	0.177299	4.43909
Zalophus californianus	< 1975	Male	18	0.0343125	0.833333	0.166667	0.0310172	0.141104	4.11231
Zalophus californianus	< 1975	Male	19	0.0285938	0.866667	0.133333	0.0267133	0.110087	3.85002
Zalophus californianus	< 1975	Male	20	0.0247813	0.846154	0.153846	0.0236261	0.0833733	3.36437
Zalophus californianus	< 1975	Male	21	0.0209688	0.761905	0.238095	0.0177111	0.0597472	2.84934
Zalophus californianus	< 1975	Male	22	0.0159762	0.666667	0.333333	0.0143203	0.0420361	2.63117
Zalophus californianus	< 1975	Male	23	0.0106508	0.5	0.5	0.00907688	0.0277158	2.60222
Zalophus californianus	< 1975	Male	24	0.0053254	1	0	0.0053254	0.0186389	3.5
Zalophus californianus	< 1975	Male	25	0.0053254	0.5	0.5	0.0053254	0.0133135	2.5
Zalophus californianus	< 1975	Male	26	0.0026627	1	0	0.0026627	0.0079881	3
Zalophus californianus	< 1975	Male	27	0.0026627	1	0	0.0026627	0.0053254	2
Zalophus californianus	< 1975	Male	28	0.0026627	0	1	0.0026627	0.0026627	1
Zalophus californianus	1975-1989	Female	0	1	0.688788	0.311212	0.926716	8.87606	8.87606
Zalophus californianus	1975-1989	Female	1	0.688788	0.880607	0.119393	0.657133	7.94934	11.5411
Zalophus californianus	1975-1989	Female	2	0.606551	0.946556	0.0534436	0.594228	7.29221	12.0224
Zalophus californianus	1975-1989	Female	3	0.574135	0.943758	0.0562415	0.559362	6.69798	11.6662
Zalophus californianus	1975-1989	Female	4	0.541845	0.945315	0.0546852	0.523065	6.13862	11.3291
Zalophus californianus	1975-1989	Female	5	0.512214	0.949324	0.0506761	0.498508	5.61556	10.9633
Zalophus californianus	1975-1989	Female	6	0.486257	0.931556	0.0684444	0.468151	5.11705	10.5233
Zalophus californianus	1975-1989	Female	7	0.452975	0.943202	0.0567975	0.439402	4.6489	10.263
Zalophus californianus	1975-1989	Female	8	0.427247	0.912688	0.0873119	0.410164	4.2095	9.8526
Zalophus californianus	1975-1989	Female	9	0.389944	0.949508	0.0504924	0.379073	3.79933	9.74328
Zalophus californianus	1975-1989	Female	10	0.370254	0.94153	0.0584703	0.359234	3.42026	9.23759
Zalophus californianus	1975-1989	Female	11	0.348605	0.890772	0.109228	0.331849	3.06102	8.78077
Zalophus californianus	1975-1989	Female	12	0.310528	0.909961	0.0900389	0.294858	2.72918	8.78883
Zalophus californianus	1975-1989	Female	13	0.282568	0.883437	0.116563	0.264981	2.43432	8.61497
Zalophus californianus	1975-1989	Female	14	0.249631	0.928344	0.071656	0.239352	2.16934	8.69017
Zalophus californianus	1975-1989	Female	15	0.231744	0.91541	0.0845901	0.226669	1.92998	8.3281
Zalophus californianus	1975-1989	Female	16	0.21214	0.92351	0.0764895	0.203207	1.70332	8.02919
Zalophus californianus	1975-1989	Female	17	0.195914	0.925394	0.0746062	0.189712	1.50011	7.65698
Zalophus californianus	1975-1989	Female	18	0.181297	0.963789	0.0362108	0.179331	1.3104	7.22788
Zalophus californianus	1975-1989	Female	19	0.174733	0.902617	0.0973831	0.166705	1.13107	6.47313
Zalophus californianus	1975-1989	Female	20	0.157717	0.965392	0.0346084	0.155423	0.964361	6.11452
Zalophus californianus	1975-1989	Female	21	0.152258	0.958222	0.0417778	0.152258	0.808939	5.31294
Zalophus californianus	1975-1989	Female	22	0.145897	0.817749	0.182251	0.139092	0.65668	4.50098
Zalophus californianus	1975-1989	Female	23	0.119307	0.961538	0.0384615	0.119307	0.517588	4.33828
Zalophus californianus	1975-1989	Female	24	0.114719	0.807416	0.192584	0.106584	0.398281	3.47181
Zalophus californianus	1975-1989	Female	25	0.0926257	0.928571	0.0714286	0.0926257	0.291697	3.14921
Zalophus californianus	1975-1989	Female	26	0.0860096	0.9	0.1	0.0860096	0.199072	2.31453
Zalophus californianus	1975-1989	Female	27	0.0774086	0.46875	0.53125	0.0611137	0.113062	1.46059
Zalophus californianus	1975-1989	Female	28	0.0362853	0.333333	0.666667	0.0277581	0.0519483	1.43166
Zalophus californianus	1975-1989	Female	29	0.0120951	1	0	0.0120951	0.0241902	2
Zalophus californianus	1975-1989	Female	30	0.0120951	0	1	0.0120951	0.0120951	1
Zalophus californianus	1975-1989	Male	0	1	0.700885	0.299115	0.933946	8.42683	8.42683
Zalophus californianus	1975-1989	Male	1	0.700885	0.882672	0.117328	0.666742	7.49289	10.6906
Zalophus californianus	1975-1989	Male	2	0.618652	0.935586	0.0644136	0.60909	6.82614	11.0339
Zalophus californianus	1975-1989	Male	3	0.578802	0.937913	0.0620871	0.562774	6.21705	10.7412
Zalophus californianus	1975-1989	Male	4	0.542866	0.952052	0.0479478	0.528507	5.65428	10.4156
Zalophus californianus	1975-1989	Male	5	0.516837	0.935161	0.0648387	0.497239	5.12577	9.91758
Zalophus californianus	1975-1989	Male	6	0.483326	0.913288	0.0867123	0.462025	4.62853	9.57643
Zalophus californianus	1975-1989	Male	7	0.441416	0.904305	0.0956946	0.41921	4.16651	9.43897
Zalophus californianus	1975-1989	Male	8	0.399175	0.928625	0.0713754	0.388436	3.7473	9.38762
Zalophus californianus	1975-1989	Male	9	0.370683	0.918269	0.0817313	0.353439	3.35886	9.06128
Zalophus californianus	1975-1989	Male	10	0.340387	0.907305	0.0926948	0.322862	3.00543	8.82944
Zalophus californianus	1975-1989	Male	11	0.308835	0.943319	0.056681	0.302727	2.68256	8.68608
Zalophus californianus	1975-1989	Male	12	0.29133	0.903157	0.0968428	0.282033	2.37984	8.16887
Zalophus californianus	1975-1989	Male	13	0.263117	0.950569	0.0494309	0.259434	2.0978	7.9729
Zalophus californianus	1975-1989	Male	14	0.25011	0.931861	0.0681386	0.245895	1.83837	7.35023
Zalophus californianus	1975-1989	Male	15	0.233068	0.921997	0.0780027	0.228392	1.59247	6.83265
Zalophus californianus	1975-1989	Male	16	0.214888	0.903976	0.0960242	0.199792	1.36408	6.34786
Zalophus californianus	1975-1989	Male	17	0.194254	0.884701	0.115299	0.179153	1.16429	5.99365
Zalophus californianus	1975-1989	Male	18	0.171856	0.889575	0.110425	0.159105	0.985136	5.73232
Zalophus californianus	1975-1989	Male	19	0.152879	0.872845	0.127155	0.144248	0.826031	5.40316
Zalophus californianus	1975-1989	Male	20	0.13344	0.961538	0.0384615	0.13344	0.681783	5.10929
Zalophus californianus	1975-1989	Male	21	0.128308	0.88	0.12	0.118704	0.548343	4.27366
Zalophus californianus	1975-1989	Male	22	0.112911	0.952381	0.047619	0.112911	0.42964	3.80513
Zalophus californianus	1975-1989	Male	23	0.107534	0.803571	0.196429	0.095326	0.316729	2.94538
Zalophus californianus	1975-1989	Male	24	0.0864112	0.777778	0.222222	0.0826269	0.221403	2.5622
Zalophus californianus	1975-1989	Male	25	0.0672087	0.416667	0.583333	0.0547651	0.138776	2.06485
Zalophus californianus	1975-1989	Male	26	0.0280036	1	0	0.0280036	0.0840109	3
Zalophus californianus	1975-1989	Male	27	0.0280036	1	0	0.0280036	0.0560073	2
Zalophus californianus	1975-1989	Male	28	0.0280036	0	1	0.0280036	0.0280036	1
Zalophus californianus	1990-2004	Female	0	1	0.842342	0.157658	0.947447	14.6324	14.6324
Zalophus californianus	1990-2004	Female	1	0.842342	0.922326	0.0776738	0.819234	13.6849	16.2463
Zalophus californianus	1990-2004	Female	2	0.776914	0.960096	0.039904	0.760762	12.8657	16.56
Zalophus californianus	1990-2004	Female	3	0.745912	0.975052	0.0249479	0.737042	12.1049	16.2283
Zalophus californianus	1990-2004	Female	4	0.727303	0.979555	0.0204455	0.722158	11.3679	15.6302
Zalophus californianus	1990-2004	Female	5	0.712433	0.971394	0.0286064	0.702476	10.6457	14.9428
Zalophus californianus	1990-2004	Female	6	0.692053	0.967563	0.0324373	0.677101	9.94324	14.3678
Zalophus californianus	1990-2004	Female	7	0.669604	0.966856	0.0331442	0.656153	9.26614	13.8382
Zalophus californianus	1990-2004	Female	8	0.647411	0.979253	0.0207466	0.640243	8.60999	13.2991
Zalophus californianus	1990-2004	Female	9	0.633979	0.967657	0.0323433	0.625424	7.96975	12.571
Zalophus californianus	1990-2004	Female	10	0.613474	0.98439	0.0156096	0.605837	7.34432	11.9717
Zalophus californianus	1990-2004	Female	11	0.603898	0.947567	0.0524334	0.590091	6.73849	11.1583
Zalophus californianus	1990-2004	Female	12	0.572234	0.959782	0.0402183	0.562739	6.14839	10.7446
Zalophus californianus	1990-2004	Female	13	0.549219	0.948459	0.0515405	0.538464	5.58566	10.1702
Zalophus californianus	1990-2004	Female	14	0.520912	0.96482	0.0351803	0.514588	5.04719	9.68914
Zalophus californianus	1990-2004	Female	15	0.502587	0.984292	0.0157077	0.499113	4.5326	9.01855
Zalophus californianus	1990-2004	Female	16	0.494692	0.951394	0.0486064	0.48117	4.03349	8.15354
Zalophus californianus	1990-2004	Female	17	0.470647	0.958488	0.0415123	0.457398	3.55232	7.54774
Zalophus californianus	1990-2004	Female	18	0.451109	0.944143	0.0558569	0.443955	3.09492	6.86069
Zalophus californianus	1990-2004	Female	19	0.425912	0.939635	0.0603647	0.415528	2.65097	6.22422
Zalophus californianus	1990-2004	Female	20	0.400202	0.935239	0.0647609	0.385163	2.23544	5.58578
Zalophus californianus	1990-2004	Female	21	0.374284	0.923386	0.0766139	0.359004	1.85028	4.94351
Zalophus californianus	1990-2004	Female	22	0.345609	0.898163	0.101837	0.328661	1.49127	4.31491
Zalophus californianus	1990-2004	Female	23	0.310413	0.867051	0.132949	0.289267	1.16261	3.74537
Zalophus californianus	1990-2004	Female	24	0.269144	0.821566	0.178434	0.249437	0.873344	3.24489
Zalophus californianus	1990-2004	Female	25	0.22112	0.765006	0.234994	0.197598	0.623907	2.82158
Zalophus californianus	1990-2004	Female	26	0.169158	0.722344	0.277656	0.146357	0.426309	2.52018
Zalophus californianus	1990-2004	Female	27	0.12219	0.722159	0.277841	0.104005	0.279952	2.29111
Zalophus californianus	1990-2004	Female	28	0.0882408	0.882353	0.117647	0.0793764	0.175947	1.99394
Zalophus californianus	1990-2004	Female	29	0.0778595	0.4	0.6	0.062097	0.0965708	1.24032
Zalophus californianus	1990-2004	Female	30	0.0311438	0.166667	0.833333	0.0240925	0.0344737	1.10692
Zalophus californianus	1990-2004	Female	31	0.00519063	1	0	0.00519063	0.0103813	2
Zalophus californianus	1990-2004	Female	32	0.00519063	0	1	0.00519063	0.00519063	1
Zalophus californianus	1990-2004	Male	0	1	0.839672	0.160328	0.944147	14.0356	14.0356
Zalophus californianus	1990-2004	Male	1	0.839672	0.927004	0.072996	0.813677	13.0915	15.5912
Zalophus californianus	1990-2004	Male	2	0.778379	0.979418	0.0205816	0.771651	12.2778	15.7735
Zalophus californianus	1990-2004	Male	3	0.762359	0.958201	0.0417994	0.750532	11.5061	15.0928
Zalophus californianus	1990-2004	Male	4	0.730493	0.973903	0.0260968	0.717682	10.7556	14.7238
Zalophus californianus	1990-2004	Male	5	0.711429	0.97309	0.0269105	0.697797	10.0379	14.1095
Zalophus californianus	1990-2004	Male	6	0.692284	0.978113	0.0218875	0.687664	9.34014	13.4918
Zalophus californianus	1990-2004	Male	7	0.677132	0.9721	0.0279002	0.668782	8.65247	12.7781
Zalophus californianus	1990-2004	Male	8	0.65824	0.977133	0.0228667	0.648457	7.98369	12.1288
Zalophus californianus	1990-2004	Male	9	0.643188	0.975596	0.024404	0.633103	7.33523	11.4045
Zalophus californianus	1990-2004	Male	10	0.627492	0.96142	0.0385802	0.618252	6.70213	10.6808
Zalophus californianus	1990-2004	Male	11	0.603283	0.964434	0.035566	0.59131	6.08388	10.0846
Zalophus californianus	1990-2004	Male	12	0.581827	0.955867	0.0441331	0.571311	5.49257	9.44021
Zalophus californianus	1990-2004	Male	13	0.556149	0.951574	0.0484263	0.545608	4.92126	8.84881
Zalophus californianus	1990-2004	Male	14	0.529217	0.937738	0.0622622	0.518014	4.37565	8.26816
Zalophus californianus	1990-2004	Male	15	0.496266	0.949469	0.0505308	0.486844	3.85763	7.77331
Zalophus californianus	1990-2004	Male	16	0.47119	0.925845	0.0741547	0.456337	3.37079	7.15378
Zalophus californianus	1990-2004	Male	17	0.436249	0.888201	0.111799	0.413218	2.91445	6.68071
Zalophus californianus	1990-2004	Male	18	0.387476	0.987342	0.0126582	0.386613	2.50124	6.45519
Zalophus californianus	1990-2004	Male	19	0.382572	0.92669	0.0733101	0.378376	2.11462	5.52739
Zalophus californianus	1990-2004	Male	20	0.354525	0.885265	0.114735	0.337442	1.73625	4.89738
Zalophus californianus	1990-2004	Male	21	0.313849	0.925898	0.074102	0.305174	1.3988	4.45694
Zalophus californianus	1990-2004	Male	22	0.290592	0.83339	0.16661	0.267876	1.09363	3.76346
Zalophus californianus	1990-2004	Male	23	0.242177	0.918919	0.0810811	0.237485	0.825754	3.40972
Zalophus californianus	1990-2004	Male	24	0.222541	0.69223	0.30777	0.193741	0.588269	2.64342
Zalophus californianus	1990-2004	Male	25	0.154049	0.778828	0.221172	0.139675	0.394528	2.56105
Zalophus californianus	1990-2004	Male	26	0.119978	0.611111	0.388889	0.0985508	0.254853	2.12416
Zalophus californianus	1990-2004	Male	27	0.0733198	0.727273	0.272727	0.0670045	0.156302	2.13178
Zalophus californianus	1990-2004	Male	28	0.0533235	0.714286	0.285714	0.0490331	0.0892977	1.67464
Zalophus californianus	1990-2004	Male	29	0.0380882	0.25	0.75	0.0212205	0.0402646	1.05714
Zalophus californianus	1990-2004	Male	30	0.00952206	1	0	0.00952206	0.0190441	2
Zalophus californianus	1990-2004	Male	31	0.00952206	0	1	0.00952206	0.00952206	1
Zalophus californianus	2005-2020	Female	0	1	0.895429	0.104571	0.956828	17.2346	17.2346
Zalophus californianus	2005-2020	Female	1	0.895429	0.954044	0.0459556	0.881027	16.2778	18.1788
Zalophus californianus	2005-2020	Female	2	0.854279	0.963187	0.0368135	0.839162	15.3968	18.0231
Zalophus californianus	2005-2020	Female	3	0.82283	0.971982	0.0280181	0.807998	14.5576	17.6922
Zalophus californianus	2005-2020	Female	4	0.799776	0.964939	0.0350608	0.788101	13.7496	17.1919
Zalophus californianus	2005-2020	Female	5	0.771735	0.990217	0.0097827	0.767408	12.9615	16.7953
Zalophus californianus	2005-2020	Female	6	0.764185	0.990161	0.00983865	0.76158	12.1941	15.957
Zalophus californianus	2005-2020	Female	7	0.756667	0.979809	0.0201905	0.750477	11.4325	15.1091
Zalophus californianus	2005-2020	Female	8	0.741389	0.975601	0.0243993	0.732823	10.6821	14.4082
Zalophus californianus	2005-2020	Female	9	0.7233	0.988845	0.0111551	0.719561	9.94924	13.7554
Zalophus californianus	2005-2020	Female	10	0.715231	0.977143	0.022857	0.712056	9.22968	12.9045
Zalophus californianus	2005-2020	Female	11	0.698883	0.987919	0.0120811	0.6959	8.51763	12.1875
Zalophus californianus	2005-2020	Female	12	0.69044	0.979656	0.0203443	0.683144	7.82173	11.3286
Zalophus californianus	2005-2020	Female	13	0.676394	0.969882	0.0301182	0.661716	7.13858	10.5539
Zalophus californianus	2005-2020	Female	14	0.656022	0.990882	0.00911841	0.652193	6.47687	9.87294
Zalophus californianus	2005-2020	Female	15	0.65004	0.981132	0.0188677	0.644306	5.82467	8.96048
Zalophus californianus	2005-2020	Female	16	0.637775	0.970784	0.0292164	0.628272	5.18037	8.12256
Zalophus californianus	2005-2020	Female	17	0.619142	0.932679	0.0673211	0.602018	4.55209	7.35227
Zalophus californianus	2005-2020	Female	18	0.57746	0.956078	0.0439218	0.568263	3.95008	6.84043
Zalophus californianus	2005-2020	Female	19	0.552097	0.972766	0.0272343	0.545163	3.38181	6.12539
Zalophus californianus	2005-2020	Female	20	0.537061	0.926738	0.0732622	0.520929	2.83665	5.2818
Zalophus californianus	2005-2020	Female	21	0.497715	0.891601	0.108399	0.472123	2.31572	4.6527
Zalophus californianus	2005-2020	Female	22	0.443763	0.872688	0.127312	0.415893	1.8436	4.15446
Zalophus californianus	2005-2020	Female	23	0.387267	0.875531	0.124469	0.364235	1.42771	3.68662
Zalophus californianus	2005-2020	Female	24	0.339064	0.823065	0.176935	0.314158	1.06347	3.13649
Zalophus californianus	2005-2020	Female	25	0.279071	0.750358	0.249642	0.241994	0.749313	2.68502
Zalophus californianus	2005-2020	Female	26	0.209404	0.806672	0.193328	0.193051	0.507319	2.42268
Zalophus californianus	2005-2020	Female	27	0.16892	0.665325	0.334675	0.130502	0.314267	1.86045
Zalophus californianus	2005-2020	Female	28	0.112387	0.583044	0.416956	0.0923706	0.183765	1.63511
Zalophus californianus	2005-2020	Female	29	0.0655264	0.35	0.65	0.045526	0.0913945	1.39477
Zalophus californianus	2005-2020	Female	30	0.0229342	1	0	0.0229342	0.0458685	2
Zalophus californianus	2005-2020	Female	31	0.0229342	0	1	0.0229342	0.0229342	1
Zalophus californianus	2005-2020	Male	0	1	0.908832	0.091168	0.962464	15.7975	15.7975
Zalophus californianus	2005-2020	Male	1	0.908832	0.948892	0.0511076	0.894262	14.835	16.3232
Zalophus californianus	2005-2020	Male	2	0.862384	0.957199	0.0428007	0.846234	13.9408	16.1654
Zalophus californianus	2005-2020	Male	3	0.825473	0.963964	0.0360364	0.810562	13.0945	15.8631
Zalophus californianus	2005-2020	Male	4	0.795726	0.972476	0.0275235	0.789573	12.284	15.4375
Zalophus californianus	2005-2020	Male	5	0.773825	0.967291	0.0327092	0.75853	11.4944	14.854
Zalophus californianus	2005-2020	Male	6	0.748514	0.96571	0.0342903	0.733553	10.7359	14.3429
Zalophus californianus	2005-2020	Male	7	0.722847	0.989822	0.0101783	0.718673	10.0023	13.8374
Zalophus californianus	2005-2020	Male	8	0.715489	0.952614	0.0473856	0.695783	9.28365	12.9752
Zalophus californianus	2005-2020	Male	9	0.681586	0.988889	0.0111111	0.679618	8.58787	12.5998
Zalophus californianus	2005-2020	Male	10	0.674012	0.963039	0.0369607	0.662415	7.90825	11.7331
Zalophus californianus	2005-2020	Male	11	0.6491	0.952631	0.0473691	0.636088	7.24584	11.1629
Zalophus californianus	2005-2020	Male	12	0.618353	0.966815	0.0331852	0.608967	6.60975	10.6893
Zalophus californianus	2005-2020	Male	13	0.597833	0.958603	0.0413969	0.590126	6.00078	10.0376
Zalophus californianus	2005-2020	Male	14	0.573085	0.954919	0.0450812	0.562123	5.41066	9.44129
Zalophus californianus	2005-2020	Male	15	0.547249	0.973467	0.0265327	0.541874	4.84853	8.85983
Zalophus californianus	2005-2020	Male	16	0.532729	0.940949	0.0590514	0.519272	4.30666	8.08415
Zalophus californianus	2005-2020	Male	17	0.501271	0.950562	0.0494384	0.486506	3.78739	7.55557
Zalophus californianus	2005-2020	Male	18	0.476489	0.905884	0.0941156	0.461575	3.30088	6.92751
Zalophus californianus	2005-2020	Male	19	0.431644	0.936914	0.0630859	0.419384	2.83931	6.57789
Zalophus californianus	2005-2020	Male	20	0.404413	0.956739	0.0432612	0.396716	2.41992	5.98379
Zalophus californianus	2005-2020	Male	21	0.386918	0.890472	0.109528	0.365617	2.02321	5.22904
Zalophus californianus	2005-2020	Male	22	0.344539	0.926736	0.0732639	0.32886	1.65759	4.81103
Zalophus californianus	2005-2020	Male	23	0.319297	0.908003	0.0919971	0.306962	1.32873	4.16143
Zalophus californianus	2005-2020	Male	24	0.289923	0.831619	0.168381	0.272008	1.02177	3.52428
Zalophus californianus	2005-2020	Male	25	0.241105	0.774637	0.225363	0.214868	0.74976	3.10968
Zalophus californianus	2005-2020	Male	26	0.186769	0.800711	0.199289	0.175401	0.534892	2.86393
Zalophus californianus	2005-2020	Male	27	0.149548	0.643179	0.356821	0.114633	0.359491	2.40385
Zalophus californianus	2005-2020	Male	28	0.096186	0.795322	0.204678	0.0856896	0.244858	2.54568
Zalophus californianus	2005-2020	Male	29	0.0764988	0.625	0.375	0.0635453	0.159169	2.08067
Zalophus californianus	2005-2020	Male	30	0.0478118	1	0	0.0478118	0.0956235	2
Zalophus californianus	2005-2020	Male	31	0.0478118	0	1	0.0478118	0.0478118	1
Ursus maritimus	< 1975	Female	0	1	0.62841	0.37159	0.944108	14.9176	14.9176
Ursus maritimus	< 1975	Female	1	0.62841	0.949947	0.0500531	0.614688	13.9735	22.2362
Ursus maritimus	< 1975	Female	2	0.596956	0.983292	0.0167077	0.592627	13.3588	22.3781
Ursus maritimus	< 1975	Female	3	0.586983	0.987586	0.0124137	0.583182	12.7661	21.7487
Ursus maritimus	< 1975	Female	4	0.579696	1	0	0.579696	12.183	21.0161
Ursus maritimus	< 1975	Female	5	0.579696	1	0	0.579696	11.6033	20.0161
Ursus maritimus	< 1975	Female	6	0.579696	0.969847	0.0301534	0.572069	11.0236	19.0161
Ursus maritimus	< 1975	Female	7	0.562216	0.955456	0.0445443	0.551469	10.4515	18.5898
Ursus maritimus	< 1975	Female	8	0.537173	0.980551	0.0194489	0.532194	9.90002	18.4299
Ursus maritimus	< 1975	Female	9	0.526725	0.994536	0.00546448	0.526725	9.36783	17.785
Ursus maritimus	< 1975	Female	10	0.523847	0.989041	0.0109592	0.52185	8.8411	16.8773
Ursus maritimus	< 1975	Female	11	0.518106	0.983631	0.0163689	0.514243	8.31925	16.057
Ursus maritimus	< 1975	Female	12	0.509625	0.962073	0.0379266	0.499035	7.80501	15.3152
Ursus maritimus	< 1975	Female	13	0.490297	0.983018	0.0169823	0.486161	7.30597	14.9011
Ursus maritimus	< 1975	Female	14	0.481971	1	0	0.481971	6.81981	14.1499
Ursus maritimus	< 1975	Female	15	0.481971	1	0	0.481971	6.33784	13.1499
Ursus maritimus	< 1975	Female	16	0.481971	0.974188	0.0258119	0.476821	5.85587	12.1499
Ursus maritimus	< 1975	Female	17	0.46953	0.966217	0.0337825	0.462323	5.37905	11.4562
Ursus maritimus	< 1975	Female	18	0.453668	0.978667	0.021333	0.449385	4.91673	10.8377
Ursus maritimus	< 1975	Female	19	0.44399	0.953288	0.0467122	0.434545	4.46734	10.0618
Ursus maritimus	< 1975	Female	20	0.42325	0.966807	0.0331933	0.416805	4.0328	9.52817
Ursus maritimus	< 1975	Female	21	0.409201	0.974428	0.0255724	0.404058	3.61599	8.83671
Ursus maritimus	< 1975	Female	22	0.398737	0.982143	0.0178571	0.396188	3.21194	8.05527
Ursus maritimus	< 1975	Female	23	0.391617	0.943128	0.0568722	0.382404	2.81575	7.19006
Ursus maritimus	< 1975	Female	24	0.369344	0.924752	0.0752482	0.354	2.43334	6.58827
Ursus maritimus	< 1975	Female	25	0.341552	0.942255	0.057745	0.33336	2.07934	6.08792
Ursus maritimus	< 1975	Female	26	0.321829	0.903957	0.0960434	0.30696	1.74598	5.42519
Ursus maritimus	< 1975	Female	27	0.29092	0.932203	0.0677966	0.276463	1.43902	4.94646
Ursus maritimus	< 1975	Female	28	0.271196	0.925926	0.0740741	0.267474	1.16256	4.28678
Ursus maritimus	< 1975	Female	29	0.251108	0.791462	0.208538	0.221584	0.895085	3.56455
Ursus maritimus	< 1975	Female	30	0.198742	0.850939	0.149061	0.188002	0.673501	3.38882
Ursus maritimus	< 1975	Female	31	0.169117	0.755245	0.244755	0.152619	0.485499	2.87078
Ursus maritimus	< 1975	Female	32	0.127725	0.666667	0.333333	0.109254	0.33288	2.60622
Ursus maritimus	< 1975	Female	33	0.08515	0.8	0.2	0.0820428	0.223626	2.62626
Ursus maritimus	< 1975	Female	34	0.06812	0.6	0.4	0.0507782	0.141584	2.07844
Ursus maritimus	< 1975	Female	35	0.040872	0.75	0.25	0.040872	0.0908055	2.2217
Ursus maritimus	< 1975	Female	36	0.030654	0.333333	0.666667	0.0294974	0.0499334	1.62894
Ursus maritimus	< 1975	Female	37	0.010218	1	0	0.010218	0.020436	2
Ursus maritimus	< 1975	Female	38	0.010218	0	1	0.010218	0.010218	1
Ursus maritimus	< 1975	Male	0	1	0.563578	0.436422	0.959817	12.2955	12.2955
Ursus maritimus	< 1975	Male	1	0.563578	0.962562	0.0374377	0.556284	11.3357	20.1138
Ursus maritimus	< 1975	Male	2	0.542479	0.97664	0.0233596	0.538017	10.7794	19.8707
Ursus maritimus	< 1975	Male	3	0.529807	0.987381	0.0126187	0.526881	10.2414	19.3305
Ursus maritimus	< 1975	Male	4	0.523121	1	0	0.523121	9.71453	18.5703
Ursus maritimus	< 1975	Male	5	0.523121	0.987097	0.0129032	0.520555	9.19141	17.5703
Ursus maritimus	< 1975	Male	6	0.516371	0.981048	0.0189516	0.512908	8.67086	16.7919
Ursus maritimus	< 1975	Male	7	0.506585	0.974999	0.0250015	0.500099	8.15795	16.1038
Ursus maritimus	< 1975	Male	8	0.49392	0.993421	0.00657895	0.49392	7.65785	15.5042
Ursus maritimus	< 1975	Male	9	0.49067	0.972929	0.0270714	0.479845	7.16393	14.6003
Ursus maritimus	< 1975	Male	10	0.477387	0.985762	0.0142376	0.474145	6.68408	14.0014
Ursus maritimus	< 1975	Male	11	0.47059	0.948913	0.0510869	0.461477	6.20994	13.1961
Ursus maritimus	< 1975	Male	12	0.446549	0.976864	0.0231356	0.438968	5.74846	12.8731
Ursus maritimus	< 1975	Male	13	0.436218	1	0	0.436218	5.30949	12.1716
Ursus maritimus	< 1975	Male	14	0.436218	1	0	0.436218	4.87328	11.1716
Ursus maritimus	< 1975	Male	15	0.436218	0.991304	0.00869565	0.436218	4.43706	10.1716
Ursus maritimus	< 1975	Male	16	0.432425	0.95614	0.0438596	0.421216	4.00084	9.2521
Ursus maritimus	< 1975	Male	17	0.413459	0.981818	0.0181818	0.412008	3.57962	8.65775
Ursus maritimus	< 1975	Male	18	0.405942	0.922711	0.0772894	0.391752	3.16761	7.80313
Ursus maritimus	< 1975	Male	19	0.374567	0.936809	0.063191	0.360816	2.77586	7.41087
Ursus maritimus	< 1975	Male	20	0.350897	0.92174	0.0782597	0.339044	2.41505	6.88249
Ursus maritimus	< 1975	Male	21	0.323436	0.901818	0.0981824	0.306115	2.076	6.41859
Ursus maritimus	< 1975	Male	22	0.29168	0.972024	0.0279762	0.286431	1.76989	6.0679
Ursus maritimus	< 1975	Male	23	0.28352	0.90963	0.09037	0.271901	1.48346	5.23228
Ursus maritimus	< 1975	Male	24	0.257899	0.852739	0.147261	0.243564	1.21156	4.6978
Ursus maritimus	< 1975	Male	25	0.21992	0.888889	0.111111	0.210125	0.967992	4.40156
Ursus maritimus	< 1975	Male	26	0.195485	0.733333	0.266667	0.172023	0.757867	3.87686
Ursus maritimus	< 1975	Male	27	0.143355	0.916364	0.0836364	0.137273	0.585844	4.08665
Ursus maritimus	< 1975	Male	28	0.131366	0.729825	0.270175	0.10977	0.448571	3.41467
Ursus maritimus	< 1975	Male	29	0.0958739	0.923077	0.0769231	0.0958739	0.3388	3.53381
Ursus maritimus	< 1975	Male	30	0.088499	0.8	0.2	0.0764043	0.242926	2.74496
Ursus maritimus	< 1975	Male	31	0.0707992	0.714286	0.285714	0.0576099	0.166522	2.35203
Ursus maritimus	< 1975	Male	32	0.0505708	0.6	0.4	0.0482272	0.108912	2.15366
Ursus maritimus	< 1975	Male	33	0.0303425	0.5	0.5	0.0303425	0.060685	2
Ursus maritimus	< 1975	Male	34	0.0151712	1	0	0.0151712	0.0303425	2
Ursus maritimus	< 1975	Male	35	0.0151712	0	1	0.0151712	0.0151712	1
Ursus maritimus	1975-1989	Female	0	1	0.595815	0.404185	0.955508	12.8855	12.8855
Ursus maritimus	1975-1989	Female	1	0.595815	0.909752	0.0902485	0.564676	11.93	20.023
Ursus maritimus	1975-1989	Female	2	0.542043	0.976191	0.0238085	0.536408	11.3654	20.9676
Ursus maritimus	1975-1989	Female	3	0.529138	0.97541	0.0245902	0.518035	10.8289	20.4652
Ursus maritimus	1975-1989	Female	4	0.516127	0.975926	0.0240741	0.510287	10.3109	19.9775
Ursus maritimus	1975-1989	Female	5	0.503701	0.98419	0.01581	0.501631	9.80062	19.4572
Ursus maritimus	1975-1989	Female	6	0.495738	0.976923	0.0230769	0.490952	9.29899	18.7579
Ursus maritimus	1975-1989	Female	7	0.484298	0.968504	0.0314961	0.474458	8.80804	18.1872
Ursus maritimus	1975-1989	Female	8	0.469044	0.968474	0.0315259	0.460565	8.33358	17.7672
Ursus maritimus	1975-1989	Female	9	0.454257	0.985075	0.0149254	0.453341	7.87302	17.3316
Ursus maritimus	1975-1989	Female	10	0.447477	0.978873	0.0211268	0.440518	7.41967	16.5811
Ursus maritimus	1975-1989	Female	11	0.438023	0.992701	0.00729927	0.438023	6.97916	15.9333
Ursus maritimus	1975-1989	Female	12	0.434826	0.970526	0.0294739	0.430129	6.54113	15.0431
Ursus maritimus	1975-1989	Female	13	0.42201	0.977038	0.0229622	0.420008	6.111	14.4807
Ursus maritimus	1975-1989	Female	14	0.41232	0.984848	0.0151515	0.410882	5.691	13.8024
Ursus maritimus	1975-1989	Female	15	0.406073	0.962064	0.0379357	0.399559	5.28011	13.0029
Ursus maritimus	1975-1989	Female	16	0.390668	0.961892	0.0381083	0.384068	4.88055	12.4928
Ursus maritimus	1975-1989	Female	17	0.37578	0.984733	0.0152672	0.374156	4.49649	11.9657
Ursus maritimus	1975-1989	Female	18	0.370043	0.968752	0.0312481	0.363213	4.12233	11.1401
Ursus maritimus	1975-1989	Female	19	0.35848	0.983871	0.016129	0.355735	3.75912	10.4863
Ursus maritimus	1975-1989	Female	20	0.352698	0.92421	0.0757901	0.345265	3.40338	9.64956
Ursus maritimus	1975-1989	Female	21	0.325967	0.944451	0.0555491	0.316502	3.05812	9.38168
Ursus maritimus	1975-1989	Female	22	0.30786	0.94998	0.0500202	0.299124	2.74162	8.9054
Ursus maritimus	1975-1989	Female	23	0.292461	0.967602	0.0323985	0.288447	2.44249	8.35152
Ursus maritimus	1975-1989	Female	24	0.282985	0.9625	0.0375	0.278439	2.15405	7.61186
Ursus maritimus	1975-1989	Female	25	0.272373	0.900244	0.0997561	0.263382	1.87561	6.88616
Ursus maritimus	1975-1989	Female	26	0.245203	0.915789	0.0842105	0.234512	1.61223	6.57508
Ursus maritimus	1975-1989	Female	27	0.224554	0.892929	0.107071	0.212832	1.37771	6.13533
Ursus maritimus	1975-1989	Female	28	0.200511	0.91517	0.0848301	0.192106	1.16488	5.80957
Ursus maritimus	1975-1989	Female	29	0.183501	0.899343	0.100657	0.175714	0.972776	5.30119
Ursus maritimus	1975-1989	Female	30	0.165031	0.835503	0.164497	0.15446	0.797062	4.82978
Ursus maritimus	1975-1989	Female	31	0.137884	0.96875	0.03125	0.137884	0.642602	4.66046
Ursus maritimus	1975-1989	Female	32	0.133575	0.862069	0.137931	0.124204	0.504718	3.77854
Ursus maritimus	1975-1989	Female	33	0.115151	0.79619	0.20381	0.105718	0.380514	3.30448
Ursus maritimus	1975-1989	Female	34	0.0916819	0.885417	0.114583	0.0857279	0.274796	2.99728
Ursus maritimus	1975-1989	Female	35	0.0811767	0.733333	0.266667	0.070009	0.189068	2.32909
Ursus maritimus	1975-1989	Female	36	0.0595296	1	0	0.0595296	0.119059	2
Ursus maritimus	1975-1989	Female	37	0.0595296	0	1	0.0595296	0.0595296	1
Ursus maritimus	1975-1989	Male	0	1	0.58295	0.41705	0.954647	11.2101	11.2101
Ursus maritimus	1975-1989	Male	1	0.58295	0.950665	0.049335	0.578233	10.2554	17.5923
Ursus maritimus	1975-1989	Male	2	0.55419	0.964706	0.0352941	0.540172	9.6772	17.4619
Ursus maritimus	1975-1989	Male	3	0.534631	0.978495	0.0215054	0.527042	9.13703	17.0904
Ursus maritimus	1975-1989	Male	4	0.523133	0.988506	0.0114943	0.523133	8.60999	16.4585
Ursus maritimus	1975-1989	Male	5	0.51712	0.975	0.025	0.511465	8.08685	15.6382
Ursus maritimus	1975-1989	Male	6	0.504192	0.962951	0.0370485	0.492797	7.57539	15.0248
Ursus maritimus	1975-1989	Male	7	0.485513	1	0	0.485513	7.08259	14.5879
Ursus maritimus	1975-1989	Male	8	0.485513	0.932224	0.0677765	0.472467	6.59708	13.5879
Ursus maritimus	1975-1989	Male	9	0.452606	0.965778	0.0342215	0.448837	6.12461	13.5319
Ursus maritimus	1975-1989	Male	10	0.437117	0.955277	0.0447227	0.424397	5.67577	12.9846
Ursus maritimus	1975-1989	Male	11	0.417568	0.942398	0.0576017	0.398902	5.25138	12.5761
Ursus maritimus	1975-1989	Male	12	0.393516	0.987805	0.0121951	0.393516	4.85248	12.3311
Ursus maritimus	1975-1989	Male	13	0.388717	1	0	0.388717	4.45896	11.471
Ursus maritimus	1975-1989	Male	14	0.388717	0.977141	0.0228594	0.385238	4.07024	10.471
Ursus maritimus	1975-1989	Male	15	0.379831	0.977273	0.0227273	0.376244	3.68501	9.7017
Ursus maritimus	1975-1989	Male	16	0.371198	0.920078	0.0799219	0.356493	3.30876	8.91373
Ursus maritimus	1975-1989	Male	17	0.341531	0.924487	0.0755133	0.328407	2.95227	8.64421
Ursus maritimus	1975-1989	Male	18	0.315741	0.926278	0.0737223	0.302867	2.62386	8.31016
Ursus maritimus	1975-1989	Male	19	0.292464	0.935232	0.0647675	0.282651	2.32099	7.936
Ursus maritimus	1975-1989	Male	20	0.273522	0.95	0.05	0.263394	2.03834	7.45221
Ursus maritimus	1975-1989	Male	21	0.259846	0.909704	0.0902965	0.247944	1.77495	6.83078
Ursus maritimus	1975-1989	Male	22	0.236383	0.922144	0.0778565	0.228304	1.527	6.45989
Ursus maritimus	1975-1989	Male	23	0.217979	0.844019	0.155981	0.207489	1.2987	5.95792
Ursus maritimus	1975-1989	Male	24	0.183978	0.905275	0.0947249	0.17538	1.09121	5.9312
Ursus maritimus	1975-1989	Male	25	0.166551	0.885417	0.114583	0.157325	0.915832	5.49881
Ursus maritimus	1975-1989	Male	26	0.147467	0.907136	0.0928641	0.140346	0.758507	5.14358
Ursus maritimus	1975-1989	Male	27	0.133772	0.876042	0.123958	0.128387	0.618161	4.62099
Ursus maritimus	1975-1989	Male	28	0.11719	0.853333	0.146667	0.104904	0.489775	4.17931
Ursus maritimus	1975-1989	Male	29	0.100002	1	0	0.100002	0.384871	3.84862
Ursus maritimus	1975-1989	Male	30	0.100002	0.767677	0.232323	0.0899941	0.284868	2.84862
Ursus maritimus	1975-1989	Male	31	0.0767695	0.733333	0.266667	0.0645677	0.194874	2.53843
Ursus maritimus	1975-1989	Male	32	0.0562976	0.727273	0.272727	0.0458527	0.130307	2.3146
Ursus maritimus	1975-1989	Male	33	0.0409437	0.875	0.125	0.0409437	0.0844539	2.06268
Ursus maritimus	1975-1989	Male	34	0.0358258	0.285714	0.714286	0.0230383	0.0435102	1.2145
Ursus maritimus	1975-1989	Male	35	0.0102359	1	0	0.0102359	0.0204719	2
Ursus maritimus	1975-1989	Male	36	0.0102359	0	1	0.0102359	0.0102359	1
Ursus maritimus	1990-2004	Female	0	1	0.705242	0.294758	0.976529	16.2755	16.2755
Ursus maritimus	1990-2004	Female	1	0.705242	0.948389	0.0516107	0.689318	15.299	21.6932
Ursus maritimus	1990-2004	Female	2	0.668844	0.986111	0.0138889	0.668844	14.6096	21.8431
Ursus maritimus	1990-2004	Female	3	0.659555	1	0	0.659555	13.9408	21.1367
Ursus maritimus	1990-2004	Female	4	0.659555	1	0	0.659555	13.2813	20.1367
Ursus maritimus	1990-2004	Female	5	0.659555	0.966034	0.0339662	0.647967	12.6217	19.1367
Ursus maritimus	1990-2004	Female	6	0.637152	0.988372	0.0116279	0.637152	11.9737	18.7926
Ursus maritimus	1990-2004	Female	7	0.629743	0.988764	0.011236	0.629743	11.3366	18.0019
Ursus maritimus	1990-2004	Female	8	0.622668	0.967859	0.0321412	0.615863	10.7068	17.1951
Ursus maritimus	1990-2004	Female	9	0.602654	0.979592	0.0204082	0.595459	10.091	16.7442
Ursus maritimus	1990-2004	Female	10	0.590355	0.979696	0.020304	0.58217	9.49551	16.0844
Ursus maritimus	1990-2004	Female	11	0.578369	0.990291	0.00970874	0.578369	8.91334	15.4112
Ursus maritimus	1990-2004	Female	12	0.572753	0.990826	0.00917431	0.572753	8.33497	14.5525
Ursus maritimus	1990-2004	Female	13	0.567499	0.99115	0.00884956	0.567499	7.76222	13.6779
Ursus maritimus	1990-2004	Female	14	0.562477	0.981651	0.0183486	0.558245	7.19472	12.7911
Ursus maritimus	1990-2004	Female	15	0.552156	0.971963	0.0280374	0.546273	6.63647	12.0192
Ursus maritimus	1990-2004	Female	16	0.536675	0.973135	0.0268647	0.525622	6.0902	11.348
Ursus maritimus	1990-2004	Female	17	0.522257	0.963133	0.0368671	0.513979	5.56458	10.6549
Ursus maritimus	1990-2004	Female	18	0.503003	0.979798	0.020202	0.493669	5.0506	10.0409
Ursus maritimus	1990-2004	Female	19	0.492842	0.96	0.04	0.487072	4.55693	9.24624
Ursus maritimus	1990-2004	Female	20	0.473128	0.968643	0.0313573	0.467912	4.06986	8.60203
Ursus maritimus	1990-2004	Female	21	0.458292	0.939914	0.0600855	0.436229	3.60195	7.8595
Ursus maritimus	1990-2004	Female	22	0.430755	0.945055	0.0549451	0.420314	3.16572	7.34923
Ursus maritimus	1990-2004	Female	23	0.407087	0.969388	0.0306122	0.397118	2.7454	6.74402
Ursus maritimus	1990-2004	Female	24	0.394625	0.868152	0.131848	0.361974	2.34829	5.95067
Ursus maritimus	1990-2004	Female	25	0.342595	0.93171	0.0682896	0.335737	1.98631	5.79784
Ursus maritimus	1990-2004	Female	26	0.319199	0.865482	0.134518	0.294759	1.65057	5.17098
Ursus maritimus	1990-2004	Female	27	0.276261	0.870663	0.129337	0.26069	1.35582	4.90773
Ursus maritimus	1990-2004	Female	28	0.240531	0.918333	0.0816667	0.227268	1.09513	4.55296
Ursus maritimus	1990-2004	Female	29	0.220887	0.847566	0.152434	0.203264	0.867858	3.92896
Ursus maritimus	1990-2004	Female	30	0.187216	0.857843	0.142157	0.172931	0.664594	3.54987
Ursus maritimus	1990-2004	Female	31	0.160602	0.832838	0.167162	0.148706	0.491662	3.06136
Ursus maritimus	1990-2004	Female	32	0.133756	0.888889	0.111111	0.124302	0.342957	2.56405
Ursus maritimus	1990-2004	Female	33	0.118894	0.59375	0.40625	0.0955149	0.218655	1.83908
Ursus maritimus	1990-2004	Female	34	0.0705933	0.695906	0.304094	0.0583293	0.12314	1.74436
Ursus maritimus	1990-2004	Female	35	0.0491263	0.316872	0.683128	0.0336774	0.0648109	1.31927
Ursus maritimus	1990-2004	Female	36	0.0155668	1	0	0.0155668	0.0311336	2
Ursus maritimus	1990-2004	Female	37	0.0155668	0	1	0.0155668	0.0155668	1
Ursus maritimus	1990-2004	Male	0	1	0.689933	0.310067	0.969142	14.5687	14.5687
Ursus maritimus	1990-2004	Male	1	0.689933	0.987342	0.0126582	0.689933	13.5995	19.7114
Ursus maritimus	1990-2004	Male	2	0.6812	0.988636	0.0113636	0.6812	12.9096	18.9513
Ursus maritimus	1990-2004	Male	3	0.673459	0.966161	0.0338385	0.662329	12.2284	18.1576
Ursus maritimus	1990-2004	Male	4	0.65067	1	0	0.65067	11.5661	17.7756
Ursus maritimus	1990-2004	Male	5	0.65067	0.947473	0.0525266	0.634538	10.9154	16.7756
Ursus maritimus	1990-2004	Male	6	0.616492	0.977273	0.0227273	0.610221	10.2809	16.6764
Ursus maritimus	1990-2004	Male	7	0.602481	1	0	0.602481	9.67064	16.0514
Ursus maritimus	1990-2004	Male	8	0.602481	0.97619	0.0238095	0.59018	9.06816	15.0514
Ursus maritimus	1990-2004	Male	9	0.588136	0.987805	0.0121951	0.588136	8.47798	14.415
Ursus maritimus	1990-2004	Male	10	0.580964	0.952796	0.0472041	0.572496	7.88985	13.5806
Ursus maritimus	1990-2004	Male	11	0.55354	1	0	0.55354	7.31735	13.2192
Ursus maritimus	1990-2004	Male	12	0.55354	0.976045	0.0239547	0.549098	6.76381	12.2192
Ursus maritimus	1990-2004	Male	13	0.54028	0.975904	0.0240964	0.532925	6.21471	11.5028
Ursus maritimus	1990-2004	Male	14	0.527261	0.975141	0.0248593	0.521625	5.68179	10.776
Ursus maritimus	1990-2004	Male	15	0.514154	0.932432	0.0675676	0.492198	5.16016	10.0362
Ursus maritimus	1990-2004	Male	16	0.479414	0.970109	0.0298913	0.479414	4.66796	9.73681
Ursus maritimus	1990-2004	Male	17	0.465084	0.949727	0.0502729	0.455264	4.18855	9.00601
Ursus maritimus	1990-2004	Male	18	0.441703	0.982759	0.0172414	0.441703	3.73329	8.45203
Ursus maritimus	1990-2004	Male	19	0.434087	0.984127	0.015873	0.434087	3.29158	7.58277
Ursus maritimus	1990-2004	Male	20	0.427197	0.925926	0.0740741	0.415361	2.8575	6.68895
Ursus maritimus	1990-2004	Male	21	0.395553	0.923462	0.0765385	0.375117	2.44214	6.17398
Ursus maritimus	1990-2004	Male	22	0.365278	0.940392	0.0596083	0.355727	2.06702	5.65876
Ursus maritimus	1990-2004	Male	23	0.343504	0.829377	0.170623	0.311375	1.71129	4.98187
Ursus maritimus	1990-2004	Male	24	0.284894	0.818361	0.181639	0.251856	1.39992	4.91381
Ursus maritimus	1990-2004	Male	25	0.233146	0.969697	0.030303	0.233146	1.14806	4.9242
Ursus maritimus	1990-2004	Male	26	0.226081	0.80129	0.19871	0.207033	0.914914	4.04683
Ursus maritimus	1990-2004	Male	27	0.181157	0.8	0.2	0.163076	0.70788	3.90756
Ursus maritimus	1990-2004	Male	28	0.144925	0.9	0.1	0.134779	0.544805	3.75921
Ursus maritimus	1990-2004	Male	29	0.130433	0.787037	0.212963	0.116381	0.410026	3.14358
Ursus maritimus	1990-2004	Male	30	0.102656	0.857143	0.142857	0.0965303	0.293645	2.86049
Ursus maritimus	1990-2004	Male	31	0.0879904	0.534722	0.465278	0.0683562	0.197114	2.24018
Ursus maritimus	1990-2004	Male	32	0.0470504	0.857143	0.142857	0.0470504	0.128758	2.7366
Ursus maritimus	1990-2004	Male	33	0.040329	0.8	0.2	0.040329	0.0817078	2.02603
Ursus maritimus	1990-2004	Male	34	0.0322632	0.25	0.75	0.0171815	0.0413788	1.28254
Ursus maritimus	1990-2004	Male	35	0.00806579	1	0	0.00806579	0.0241974	3
Ursus maritimus	1990-2004	Male	36	0.00806579	1	0	0.00806579	0.0161316	2
Ursus maritimus	1990-2004	Male	37	0.00806579	0	1	0.00806579	0.00806579	1
Ursus maritimus	2005-2020	Female	0	1	0.8416	0.1584	0.98631	22.6706	22.6706
Ursus maritimus	2005-2020	Female	1	0.8416	1	0	0.8416	21.6843	25.7655
Ursus maritimus	2005-2020	Female	2	0.8416	0.9875	0.0125	0.8416	20.8427	24.7655
Ursus maritimus	2005-2020	Female	3	0.83108	1	0	0.83108	20.0011	24.0664
Ursus maritimus	2005-2020	Female	4	0.83108	1	0	0.83108	19.17	23.0664
Ursus maritimus	2005-2020	Female	5	0.83108	1	0	0.83108	18.3389	22.0664
Ursus maritimus	2005-2020	Female	6	0.83108	1	0	0.83108	17.5078	21.0664
Ursus maritimus	2005-2020	Female	7	0.83108	1	0	0.83108	16.6768	20.0664
Ursus maritimus	2005-2020	Female	8	0.83108	1	0	0.83108	15.8457	19.0664
Ursus maritimus	2005-2020	Female	9	0.83108	1	0	0.83108	15.0146	18.0664
Ursus maritimus	2005-2020	Female	10	0.83108	0.982143	0.0178571	0.83108	14.1835	17.0664
Ursus maritimus	2005-2020	Female	11	0.81624	0.982759	0.0172414	0.81624	13.3524	16.3585
Ursus maritimus	2005-2020	Female	12	0.802167	0.982759	0.0172414	0.802167	12.5362	15.6279
Ursus maritimus	2005-2020	Female	13	0.788336	0.982759	0.0172414	0.788336	11.734	14.8846
Ursus maritimus	2005-2020	Female	14	0.774744	1	0	0.774744	10.9457	14.1281
Ursus maritimus	2005-2020	Female	15	0.774744	1	0	0.774744	10.171	13.1281
Ursus maritimus	2005-2020	Female	16	0.774744	1	0	0.774744	9.39621	12.1281
Ursus maritimus	2005-2020	Female	17	0.774744	0.986111	0.0138889	0.774744	8.62146	11.1281
Ursus maritimus	2005-2020	Female	18	0.763984	0.973511	0.0264889	0.763984	7.84672	10.2708
Ursus maritimus	2005-2020	Female	19	0.743747	0.948394	0.0516063	0.73039	7.08273	9.52305
Ursus maritimus	2005-2020	Female	20	0.705365	0.945205	0.0547945	0.686589	6.35234	9.00576
Ursus maritimus	2005-2020	Female	21	0.666715	1	0	0.666715	5.66576	8.49802
Ursus maritimus	2005-2020	Female	22	0.666715	0.972222	0.0277778	0.651343	4.99904	7.49802
Ursus maritimus	2005-2020	Female	23	0.648195	0.862572	0.137428	0.605292	4.3477	6.70739
Ursus maritimus	2005-2020	Female	24	0.559114	0.984375	0.015625	0.559114	3.74241	6.69345
Ursus maritimus	2005-2020	Female	25	0.550378	0.952621	0.047379	0.529691	3.18329	5.78382
Ursus maritimus	2005-2020	Female	26	0.524302	0.967742	0.0322581	0.512294	2.6536	5.06121
Ursus maritimus	2005-2020	Female	27	0.507389	0.881545	0.118455	0.471669	2.14131	4.22025
Ursus maritimus	2005-2020	Female	28	0.447286	0.845955	0.154045	0.41346	1.66964	3.73282
Ursus maritimus	2005-2020	Female	29	0.378384	0.77714	0.22286	0.342837	1.25618	3.31985
Ursus maritimus	2005-2020	Female	30	0.294058	0.79129	0.20871	0.263476	0.913341	3.10599
Ursus maritimus	2005-2020	Female	31	0.232685	0.88	0.12	0.217886	0.649864	2.7929
Ursus maritimus	2005-2020	Female	32	0.204763	0.630303	0.369697	0.162454	0.431978	2.10966
Ursus maritimus	2005-2020	Female	33	0.129062	0.681818	0.318182	0.107991	0.269524	2.08833
Ursus maritimus	2005-2020	Female	34	0.0879971	0.8	0.2	0.0734776	0.161533	1.83567
Ursus maritimus	2005-2020	Female	35	0.0703977	0.375	0.625	0.0352576	0.0880558	1.25083
Ursus maritimus	2005-2020	Female	36	0.0263991	1	0	0.0263991	0.0527983	2
Ursus maritimus	2005-2020	Female	37	0.0263991	0	1	0.0263991	0.0263991	1
Ursus maritimus	2005-2020	Male	0	1	0.789324	0.210676	0.99501	18.2773	18.2773
Ursus maritimus	2005-2020	Male	1	0.789324	0.987654	0.0123457	0.789324	17.2823	21.8951
Ursus maritimus	2005-2020	Male	2	0.77958	0.987013	0.012987	0.77958	16.493	21.1563
Ursus maritimus	2005-2020	Male	3	0.769455	1	0	0.769455	15.7134	20.4215
Ursus maritimus	2005-2020	Male	4	0.769455	1	0	0.769455	14.944	19.4215
Ursus maritimus	2005-2020	Male	5	0.769455	0.987013	0.012987	0.769455	14.1745	18.4215
Ursus maritimus	2005-2020	Male	6	0.759462	0.987013	0.012987	0.759462	13.405	17.6507
Ursus maritimus	2005-2020	Male	7	0.749599	0.986301	0.0136986	0.749599	12.6456	16.8698
Ursus maritimus	2005-2020	Male	8	0.739331	0.985915	0.0140845	0.739331	11.896	16.0902
Ursus maritimus	2005-2020	Male	9	0.728918	0.971609	0.0283905	0.720847	11.1567	15.3058
Ursus maritimus	2005-2020	Male	10	0.708223	0.984127	0.015873	0.708223	10.4358	14.7352
Ursus maritimus	2005-2020	Male	11	0.696982	0.967994	0.0320062	0.695978	9.72758	13.9567
Ursus maritimus	2005-2020	Male	12	0.674674	1	0	0.674674	9.0316	13.3866
Ursus maritimus	2005-2020	Male	13	0.674674	0.982143	0.0178571	0.674674	8.35693	12.3866
Ursus maritimus	2005-2020	Male	14	0.662626	1	0	0.662626	7.68226	11.5937
Ursus maritimus	2005-2020	Male	15	0.662626	1	0	0.662626	7.01963	10.5937
Ursus maritimus	2005-2020	Male	16	0.662626	0.983871	0.016129	0.662626	6.357	9.59365
Ursus maritimus	2005-2020	Male	17	0.651939	0.894675	0.105325	0.6179	5.69438	8.73453
Ursus maritimus	2005-2020	Male	18	0.583273	0.932203	0.0677966	0.561227	5.07648	8.70343
Ursus maritimus	2005-2020	Male	19	0.543729	0.966667	0.0333333	0.530272	4.51525	8.30423
Ursus maritimus	2005-2020	Male	20	0.525605	0.9375	0.0625	0.507768	3.98498	7.5817
Ursus maritimus	2005-2020	Male	21	0.492754	0.931034	0.0689655	0.47253	3.47721	7.05668
Ursus maritimus	2005-2020	Male	22	0.458771	0.927273	0.0727273	0.434204	3.00468	6.54941
Ursus maritimus	2005-2020	Male	23	0.425406	0.941945	0.0580546	0.415198	2.57048	6.0424
Ursus maritimus	2005-2020	Male	24	0.400709	0.888385	0.111615	0.382909	2.15528	5.37866
Ursus maritimus	2005-2020	Male	25	0.355984	0.923077	0.0769231	0.344757	1.77237	4.97879
Ursus maritimus	2005-2020	Male	26	0.328601	0.869883	0.130117	0.314227	1.42761	4.34452
Ursus maritimus	2005-2020	Male	27	0.285844	0.823529	0.176471	0.258017	1.11339	3.89508
Ursus maritimus	2005-2020	Male	28	0.235401	0.750958	0.249042	0.209522	0.855368	3.63366
Ursus maritimus	2005-2020	Male	29	0.176776	0.8	0.2	0.167446	0.645846	3.65346
Ursus maritimus	2005-2020	Male	30	0.141421	0.833333	0.166667	0.13007	0.4784	3.3828
Ursus maritimus	2005-2020	Male	31	0.117851	0.789744	0.210256	0.11092	0.34833	2.95568
Ursus maritimus	2005-2020	Male	32	0.093072	0.8	0.2	0.08786	0.23741	2.55082
Ursus maritimus	2005-2020	Male	33	0.0744576	0.612245	0.387755	0.0626128	0.14955	2.00852
Ursus maritimus	2005-2020	Male	34	0.0455863	0.4	0.6	0.0322334	0.086937	1.90709
Ursus maritimus	2005-2020	Male	35	0.0182345	1	0	0.0182345	0.0547035	3
Ursus maritimus	2005-2020	Male	36	0.0182345	0.5	0.5	0.0182345	0.036469	2
Ursus maritimus	2005-2020	Male	37	0.00911726	1	0	0.00911726	0.0182345	2
Ursus maritimus	2005-2020	Male	38	0.00911726	0	1	0.00911726	0.00911726	1
Tursiops truncatus	< 1990	Female	0	1	0.474047	0.525953	0.98058	4.60897	4.60897
Tursiops truncatus	< 1990	Female	1	0.474047	0.664835	0.335165	0.368343	3.62839	7.65408
Tursiops truncatus	< 1990	Female	2	0.315163	0.947368	0.0526316	0.315163	3.26005	10.344
Tursiops truncatus	< 1990	Female	3	0.298576	0.821828	0.178172	0.280483	2.94489	9.86312
Tursiops truncatus	< 1990	Female	4	0.245378	0.840929	0.159071	0.228292	2.6644	10.8584
Tursiops truncatus	< 1990	Female	5	0.206345	0.969697	0.030303	0.206345	2.43611	11.806
Tursiops truncatus	< 1990	Female	6	0.200092	0.922365	0.0776353	0.187881	2.22977	11.1437
Tursiops truncatus	< 1990	Female	7	0.184558	0.817088	0.182912	0.167771	2.04189	11.0637
Tursiops truncatus	< 1990	Female	8	0.1508	0.956522	0.0434783	0.145574	1.87412	12.4278
Tursiops truncatus	< 1990	Female	9	0.144244	0.911561	0.0884387	0.135697	1.72854	11.9835
Tursiops truncatus	< 1990	Female	10	0.131487	0.942308	0.0576923	0.125423	1.59284	12.1141
Tursiops truncatus	< 1990	Female	11	0.123901	0.962264	0.0377358	0.12125	1.46742	11.8435
Tursiops truncatus	< 1990	Female	12	0.119226	0.946685	0.0533152	0.117056	1.34617	11.291
Tursiops truncatus	< 1990	Female	13	0.112869	0.953831	0.0461691	0.109023	1.22911	10.8897
Tursiops truncatus	< 1990	Female	14	0.107658	0.908226	0.0917742	0.104495	1.12009	10.4042
Tursiops truncatus	< 1990	Female	15	0.0977778	0.968002	0.0319979	0.0958349	1.0156	10.3868
Tursiops truncatus	< 1990	Female	16	0.0946491	0.919319	0.0806811	0.0913066	0.919761	9.71759
Tursiops truncatus	< 1990	Female	17	0.0870127	0.961364	0.0386364	0.0856946	0.828454	9.52108
Tursiops truncatus	< 1990	Female	18	0.0836508	0.95122	0.0487805	0.0815048	0.74276	8.87929
Tursiops truncatus	< 1990	Female	19	0.0795703	0.920814	0.0791855	0.0768585	0.661255	8.31032
Tursiops truncatus	< 1990	Female	20	0.0732695	0.969697	0.030303	0.0732695	0.584396	7.97599
Tursiops truncatus	< 1990	Female	21	0.0710492	0.924444	0.0755556	0.066434	0.511127	7.19399
Tursiops truncatus	< 1990	Female	22	0.065681	0.913043	0.0869565	0.063745	0.444693	6.77049
Tursiops truncatus	< 1990	Female	23	0.0599697	0.95	0.05	0.0599697	0.380948	6.35235
Tursiops truncatus	< 1990	Female	24	0.0569712	1	0	0.0569712	0.320978	5.63405
Tursiops truncatus	< 1990	Female	25	0.0569712	0.9375	0.0625	0.0569712	0.264007	4.63405
Tursiops truncatus	< 1990	Female	26	0.0534105	1	0	0.0534105	0.207036	3.87632
Tursiops truncatus	< 1990	Female	27	0.0534105	0.846154	0.153846	0.0497369	0.153626	2.87632
Tursiops truncatus	< 1990	Female	28	0.0451935	0.777778	0.222222	0.0394462	0.103889	2.29875
Tursiops truncatus	< 1990	Female	29	0.0351505	0.833333	0.166667	0.0351505	0.0644425	1.83333
Tursiops truncatus	< 1990	Female	30	0.0292921	0	1	0.0292921	0.0292921	1
Tursiops truncatus	< 1990	Male	0	1	0.657895	0.342105	0.989737	7.86644	7.86644
Tursiops truncatus	< 1990	Male	1	0.657895	0.898396	0.101604	0.657895	6.87671	10.4526
Tursiops truncatus	< 1990	Male	2	0.59105	0.954545	0.0454545	0.586349	6.21881	10.5216
Tursiops truncatus	< 1990	Male	3	0.564184	1	0	0.564184	5.63246	9.98338
Tursiops truncatus	< 1990	Male	4	0.564184	1	0	0.564184	5.06828	8.98338
Tursiops truncatus	< 1990	Male	5	0.564184	0.875676	0.124324	0.524878	4.50409	7.98338
Tursiops truncatus	< 1990	Male	6	0.494042	0.883324	0.116676	0.451285	3.97922	8.05441
Tursiops truncatus	< 1990	Male	7	0.436399	0.788712	0.211288	0.388337	3.52793	8.08419
Tursiops truncatus	< 1990	Male	8	0.344193	0.923102	0.0768982	0.323133	3.13959	9.12161
Tursiops truncatus	< 1990	Male	9	0.317725	0.911388	0.0886124	0.308195	2.81646	8.86445
Tursiops truncatus	< 1990	Male	10	0.289571	0.870038	0.129962	0.274597	2.50827	8.66201
Tursiops truncatus	< 1990	Male	11	0.251938	0.799958	0.200042	0.221342	2.23367	8.86596
Tursiops truncatus	< 1990	Male	12	0.201539	0.98	0.02	0.201539	2.01233	9.98478
Tursiops truncatus	< 1990	Male	13	0.197509	0.916553	0.0834467	0.192391	1.81079	9.16814
Tursiops truncatus	< 1990	Male	14	0.181027	0.905923	0.0940767	0.172916	1.6184	8.94007
Tursiops truncatus	< 1990	Male	15	0.163997	0.945946	0.0540541	0.157847	1.44548	8.81408
Tursiops truncatus	< 1990	Male	16	0.155132	0.941071	0.0589286	0.152878	1.28763	8.30024
Tursiops truncatus	< 1990	Male	17	0.14599	1	0	0.14599	1.13476	7.77281
Tursiops truncatus	< 1990	Male	18	0.14599	1	0	0.14599	0.988765	6.77281
Tursiops truncatus	< 1990	Male	19	0.14599	0.8125	0.1875	0.123658	0.842775	5.77281
Tursiops truncatus	< 1990	Male	20	0.118617	1	0	0.118617	0.719116	6.0625
Tursiops truncatus	< 1990	Male	21	0.118617	1	0	0.118617	0.600499	5.0625
Tursiops truncatus	< 1990	Male	22	0.118617	0.875	0.125	0.118617	0.481882	4.0625
Tursiops truncatus	< 1990	Male	23	0.10379	1	0	0.10379	0.363265	3.5
Tursiops truncatus	< 1990	Male	24	0.10379	0.833333	0.166667	0.10379	0.259475	2.5
Tursiops truncatus	< 1990	Male	25	0.0864917	0.8	0.2	0.0864917	0.155685	1.8
Tursiops truncatus	< 1990	Male	26	0.0691933	0	1	0.0691933	0.0691933	1
Tursiops truncatus	1990-2004	Female	0	1	0.624905	0.375095	0.971064	15.825	15.825
Tursiops truncatus	1990-2004	Female	1	0.624905	0.958333	0.0416667	0.606552	14.8539	23.7698
Tursiops truncatus	1990-2004	Female	2	0.598868	1	0	0.598868	14.2473	23.7905
Tursiops truncatus	1990-2004	Female	3	0.598868	1	0	0.598868	13.6485	22.7905
Tursiops truncatus	1990-2004	Female	4	0.598868	0.937464	0.0625362	0.586168	13.0496	21.7905
Tursiops truncatus	1990-2004	Female	5	0.561417	0.979167	0.0208333	0.561417	12.4634	22.2
Tursiops truncatus	1990-2004	Female	6	0.549721	1	0	0.549721	11.902	21.651
Tursiops truncatus	1990-2004	Female	7	0.549721	0.95648	0.0435203	0.535995	11.3523	20.651
Tursiops truncatus	1990-2004	Female	8	0.525797	0.978261	0.0217391	0.525797	10.8163	20.5713
Tursiops truncatus	1990-2004	Female	9	0.514366	1	0	0.514366	10.2905	20.0062
Tursiops truncatus	1990-2004	Female	10	0.514366	0.981132	0.0188679	0.514366	9.77614	19.0062
Tursiops truncatus	1990-2004	Female	11	0.504661	0.982759	0.0172414	0.504661	9.26178	18.3525
Tursiops truncatus	1990-2004	Female	12	0.49596	0.966667	0.0333333	0.487006	8.75712	17.6569
Tursiops truncatus	1990-2004	Female	13	0.479428	1	0	0.479428	8.27011	17.2499
Tursiops truncatus	1990-2004	Female	14	0.479428	0.984127	0.015873	0.479428	7.79068	16.2499
Tursiops truncatus	1990-2004	Female	15	0.471818	0.969683	0.0303172	0.466766	7.31125	15.4959
Tursiops truncatus	1990-2004	Female	16	0.457514	0.985714	0.0142857	0.457514	6.84449	14.9602
Tursiops truncatus	1990-2004	Female	17	0.450978	0.955224	0.0447761	0.440789	6.38697	14.1625
Tursiops truncatus	1990-2004	Female	18	0.430785	0.983607	0.0163934	0.430785	5.94618	13.8031
Tursiops truncatus	1990-2004	Female	19	0.423723	1	0	0.423723	5.5154	13.0165
Tursiops truncatus	1990-2004	Female	20	0.423723	0.982759	0.0172414	0.423723	5.09168	12.0165
Tursiops truncatus	1990-2004	Female	21	0.416417	0.982456	0.0175439	0.416417	4.66795	11.2098
Tursiops truncatus	1990-2004	Female	22	0.409112	0.979167	0.0208333	0.409112	4.25154	10.3921
Tursiops truncatus	1990-2004	Female	23	0.400589	0.97619	0.0238095	0.400589	3.84242	9.59194
Tursiops truncatus	1990-2004	Female	24	0.391051	0.953488	0.0465116	0.383739	3.44184	8.8015
Tursiops truncatus	1990-2004	Female	25	0.372862	0.95	0.05	0.364358	3.0581	8.20167
Tursiops truncatus	1990-2004	Female	26	0.354219	0.923077	0.0769231	0.347506	2.69374	7.60472
Tursiops truncatus	1990-2004	Female	27	0.326972	0.941176	0.0588235	0.313554	2.34623	7.17564
Tursiops truncatus	1990-2004	Female	28	0.307738	0.876768	0.123232	0.297145	2.03268	6.60522
Tursiops truncatus	1990-2004	Female	29	0.269815	0.925926	0.0740741	0.264103	1.73553	6.43232
Tursiops truncatus	1990-2004	Female	30	0.249829	0.952381	0.047619	0.249829	1.47143	5.88977
Tursiops truncatus	1990-2004	Female	31	0.237932	0.928571	0.0714286	0.237932	1.2216	5.13426
Tursiops truncatus	1990-2004	Female	32	0.220937	0.857143	0.142857	0.208278	0.983671	4.45228
Tursiops truncatus	1990-2004	Female	33	0.189374	0.564103	0.435897	0.149695	0.775393	4.0945
Tursiops truncatus	1990-2004	Female	34	0.106827	1	0	0.106827	0.625699	5.85714
Tursiops truncatus	1990-2004	Female	35	0.106827	0.857143	0.142857	0.106827	0.518872	4.85714
Tursiops truncatus	1990-2004	Female	36	0.0915656	1	0	0.0915656	0.412045	4.5
Tursiops truncatus	1990-2004	Female	37	0.0915656	1	0	0.0915656	0.32048	3.5
Tursiops truncatus	1990-2004	Female	38	0.0915656	1	0	0.0915656	0.228914	2.5
Tursiops truncatus	1990-2004	Female	39	0.0915656	0.5	0.5	0.0915656	0.137348	1.5
Tursiops truncatus	1990-2004	Female	40	0.0457828	0	1	0.0457828	0.0457828	1
Tursiops truncatus	1990-2004	Male	0	1	0.636941	0.363059	0.971863	13.3659	13.3659
Tursiops truncatus	1990-2004	Male	1	0.636941	0.954765	0.0452354	0.630603	12.3941	19.4587
Tursiops truncatus	1990-2004	Male	2	0.608129	0.968254	0.031746	0.603785	11.7635	19.3437
Tursiops truncatus	1990-2004	Male	3	0.588823	0.947962	0.0520376	0.584217	11.1597	18.9525
Tursiops truncatus	1990-2004	Male	4	0.558182	0.945742	0.0542582	0.540982	10.5755	18.9463
Tursiops truncatus	1990-2004	Male	5	0.527896	0.979167	0.0208333	0.527896	10.0345	19.0084
Tursiops truncatus	1990-2004	Male	6	0.516899	0.980392	0.0196078	0.516899	9.50659	18.3916
Tursiops truncatus	1990-2004	Male	7	0.506763	1	0	0.506763	8.98969	17.7394
Tursiops truncatus	1990-2004	Male	8	0.506763	0.954545	0.0454545	0.490293	8.48292	16.7394
Tursiops truncatus	1990-2004	Male	9	0.483729	0.942857	0.0571429	0.474192	7.99263	16.523
Tursiops truncatus	1990-2004	Male	10	0.456087	0.943627	0.0563725	0.450302	7.51844	16.4847
Tursiops truncatus	1990-2004	Male	11	0.430376	0.967742	0.0322581	0.430376	7.06814	16.4232
Tursiops truncatus	1990-2004	Male	12	0.416493	1	0	0.416493	6.63776	15.9373
Tursiops truncatus	1990-2004	Male	13	0.416493	0.945216	0.054784	0.411412	6.22127	14.9373
Tursiops truncatus	1990-2004	Male	14	0.393676	0.972973	0.027027	0.393676	5.80986	14.758
Tursiops truncatus	1990-2004	Male	15	0.383036	0.972222	0.0277778	0.383036	5.41618	14.1401
Tursiops truncatus	1990-2004	Male	16	0.372396	0.971429	0.0285714	0.372396	5.03314	13.5156
Tursiops truncatus	1990-2004	Male	17	0.361756	1	0	0.361756	4.66075	12.8837
Tursiops truncatus	1990-2004	Male	18	0.361756	0.941176	0.0588235	0.35233	4.29899	11.8837
Tursiops truncatus	1990-2004	Male	19	0.340476	0.969697	0.030303	0.340476	3.94666	11.5916
Tursiops truncatus	1990-2004	Male	20	0.330159	0.893997	0.106003	0.309658	3.60618	10.9226
Tursiops truncatus	1990-2004	Male	21	0.295161	0.958333	0.0416667	0.295161	3.29653	11.1686
Tursiops truncatus	1990-2004	Male	22	0.282863	1	0	0.282863	3.00137	10.6107
Tursiops truncatus	1990-2004	Male	23	0.282863	0.887574	0.112426	0.258316	2.7185	9.61067
Tursiops truncatus	1990-2004	Male	24	0.251062	1	0	0.251062	2.46019	9.79913
Tursiops truncatus	1990-2004	Male	25	0.251062	1	0	0.251062	2.20913	8.79913
Tursiops truncatus	1990-2004	Male	26	0.251062	1	0	0.251062	1.95806	7.79913
Tursiops truncatus	1990-2004	Male	27	0.251062	0.857375	0.142625	0.229048	1.707	6.79913
Tursiops truncatus	1990-2004	Male	28	0.215254	0.885417	0.114583	0.198899	1.47795	6.86609
Tursiops truncatus	1990-2004	Male	29	0.19059	1	0	0.19059	1.27905	6.71104
Tursiops truncatus	1990-2004	Male	30	0.19059	0.923077	0.0769231	0.19059	1.08847	5.71104
Tursiops truncatus	1990-2004	Male	31	0.175929	0.7875	0.2125	0.146862	0.897876	5.10363
Tursiops truncatus	1990-2004	Male	32	0.138544	0.857143	0.142857	0.138544	0.751014	5.42076
Tursiops truncatus	1990-2004	Male	33	0.118752	1	0	0.118752	0.61247	5.15756
Tursiops truncatus	1990-2004	Male	34	0.118752	0.5	0.5	0.0978779	0.493718	4.15756
Tursiops truncatus	1990-2004	Male	35	0.059376	1	0	0.059376	0.39584	6.66667
Tursiops truncatus	1990-2004	Male	36	0.059376	0.666667	0.333333	0.059376	0.336464	5.66667
Tursiops truncatus	1990-2004	Male	37	0.039584	1	0	0.039584	0.277088	7
Tursiops truncatus	1990-2004	Male	38	0.039584	1	0	0.039584	0.237504	6
Tursiops truncatus	1990-2004	Male	39	0.039584	1	0	0.039584	0.19792	5
Tursiops truncatus	1990-2004	Male	40	0.039584	1	0	0.039584	0.158336	4
Tursiops truncatus	1990-2004	Male	41	0.039584	0.5	0.5	0.039584	0.118752	3
Tursiops truncatus	1990-2004	Male	42	0.019792	1	0	0.019792	0.079168	4
Tursiops truncatus	1990-2004	Male	43	0.019792	1	0	0.019792	0.059376	3
Tursiops truncatus	1990-2004	Male	44	0.019792	1	0	0.019792	0.039584	2
Tursiops truncatus	1990-2004	Male	45	0.019792	0	1	0.019792	0.019792	1
Tursiops truncatus	2005-2020	Female	0	1	0.733935	0.266065	0.976514	20.943	20.943
Tursiops truncatus	2005-2020	Female	1	0.733935	0.942544	0.0574558	0.710742	19.9665	27.2047
Tursiops truncatus	2005-2020	Female	2	0.691766	0.985714	0.0142857	0.691766	19.2557	27.8356
Tursiops truncatus	2005-2020	Female	3	0.681883	0.986111	0.0138889	0.681883	18.564	27.2245
Tursiops truncatus	2005-2020	Female	4	0.672413	0.973333	0.0266667	0.663056	17.8821	26.5939
Tursiops truncatus	2005-2020	Female	5	0.654482	0.987342	0.0126582	0.654482	17.219	26.3094
Tursiops truncatus	2005-2020	Female	6	0.646197	1	0	0.646197	16.5645	25.6339
Tursiops truncatus	2005-2020	Female	7	0.646197	0.9875	0.0125	0.646197	15.9183	24.6339
Tursiops truncatus	2005-2020	Female	8	0.63812	0.987654	0.0123457	0.63812	15.2722	23.933
Tursiops truncatus	2005-2020	Female	9	0.630242	0.987013	0.012987	0.630242	14.634	23.2197
Tursiops truncatus	2005-2020	Female	10	0.622057	0.97219	0.0278104	0.610786	14.0038	22.5121
Tursiops truncatus	2005-2020	Female	11	0.604757	0.956723	0.0432773	0.596295	13.393	22.1461
Tursiops truncatus	2005-2020	Female	12	0.578585	0.972029	0.0279706	0.573139	12.7967	22.1173
Tursiops truncatus	2005-2020	Female	13	0.562402	0.97279	0.0272096	0.560579	12.2236	21.7346
Tursiops truncatus	2005-2020	Female	14	0.547099	0.986111	0.0138889	0.547099	11.663	21.3179
Tursiops truncatus	2005-2020	Female	15	0.5395	0.955437	0.0445633	0.52805	11.1159	20.6041
Tursiops truncatus	2005-2020	Female	16	0.515458	0.984615	0.0153846	0.515458	10.5878	20.5406
Tursiops truncatus	2005-2020	Female	17	0.507528	1	0	0.507528	10.0724	19.846
Tursiops truncatus	2005-2020	Female	18	0.507528	0.968994	0.0310059	0.49567	9.56485	18.846
Tursiops truncatus	2005-2020	Female	19	0.491792	0.968734	0.0312655	0.484873	9.06918	18.4411
Tursiops truncatus	2005-2020	Female	20	0.476416	0.970149	0.0298507	0.473883	8.58431	18.0185
Tursiops truncatus	2005-2020	Female	21	0.462194	0.970372	0.029628	0.448835	8.11043	17.5477
Tursiops truncatus	2005-2020	Female	22	0.4485	0.984848	0.0151515	0.4485	7.66159	17.0827
Tursiops truncatus	2005-2020	Female	23	0.441705	0.943224	0.0567763	0.433582	7.21309	16.3301
Tursiops truncatus	2005-2020	Female	24	0.416627	1	0	0.416627	6.77951	16.2724
Tursiops truncatus	2005-2020	Female	25	0.416627	0.970372	0.029628	0.41175	6.36289	15.2724
Tursiops truncatus	2005-2020	Female	26	0.404283	0.984848	0.0151515	0.404283	5.95114	14.7202
Tursiops truncatus	2005-2020	Female	27	0.398157	1	0	0.398157	5.54685	13.9313
Tursiops truncatus	2005-2020	Female	28	0.398157	0.965392	0.0346084	0.391286	5.1487	12.9313
Tursiops truncatus	2005-2020	Female	29	0.384378	0.981132	0.0188679	0.384378	4.75741	12.3769
Tursiops truncatus	2005-2020	Female	30	0.377125	0.981132	0.0188679	0.377125	4.37303	11.5957
Tursiops truncatus	2005-2020	Female	31	0.37001	0.981132	0.0188679	0.37001	3.99591	10.7995
Tursiops truncatus	2005-2020	Female	32	0.363028	0.939167	0.0608333	0.351683	3.6259	9.98791
Tursiops truncatus	2005-2020	Female	33	0.340944	0.953488	0.0465116	0.330321	3.27421	9.60337
Tursiops truncatus	2005-2020	Female	34	0.325086	0.97561	0.0243902	0.325086	2.94389	9.05573
Tursiops truncatus	2005-2020	Female	35	0.317157	1	0	0.317157	2.61881	8.25712
Tursiops truncatus	2005-2020	Female	36	0.317157	0.91746	0.0825397	0.305562	2.30165	7.25712
Tursiops truncatus	2005-2020	Female	37	0.290979	0.937374	0.0626263	0.285687	1.99609	6.85989
Tursiops truncatus	2005-2020	Female	38	0.272756	0.962963	0.037037	0.272756	1.7104	6.2708
Tursiops truncatus	2005-2020	Female	39	0.262654	0.95	0.05	0.262654	1.43764	5.47352
Tursiops truncatus	2005-2020	Female	40	0.249522	0.894737	0.105263	0.24241	1.17499	4.70897
Tursiops truncatus	2005-2020	Female	41	0.223256	0.928571	0.0714286	0.223256	0.93258	4.17717
Tursiops truncatus	2005-2020	Female	42	0.207309	1	0	0.207309	0.709324	3.42157
Tursiops truncatus	2005-2020	Female	43	0.207309	0.511364	0.488636	0.16633	0.502014	2.42157
Tursiops truncatus	2005-2020	Female	44	0.10601	1	0	0.10601	0.335685	3.16653
Tursiops truncatus	2005-2020	Female	45	0.10601	1	0	0.10601	0.229674	2.16653
Tursiops truncatus	2005-2020	Female	46	0.10601	0.375	0.625	0.08391	0.123664	1.16653
Tursiops truncatus	2005-2020	Female	47	0.0397539	0	1	0.0397539	0.0397539	1
Tursiops truncatus	2005-2020	Male	0	1	0.782326	0.217674	0.980693	20.2444	20.2444
Tursiops truncatus	2005-2020	Male	1	0.782326	0.954158	0.0458418	0.7594	19.2637	24.6236
Tursiops truncatus	2005-2020	Male	2	0.746462	0.964286	0.0357143	0.728601	18.5043	24.7893
Tursiops truncatus	2005-2020	Male	3	0.719803	1	0	0.719803	17.7757	24.6952
Tursiops truncatus	2005-2020	Male	4	0.719803	0.964979	0.0350205	0.709296	17.0559	23.6952
Tursiops truncatus	2005-2020	Male	5	0.694595	0.988636	0.0113636	0.694595	16.3466	23.534
Tursiops truncatus	2005-2020	Male	6	0.686702	0.942877	0.0571234	0.66881	15.652	22.793
Tursiops truncatus	2005-2020	Male	7	0.647475	0.949976	0.0500241	0.639437	14.9832	23.141
Tursiops truncatus	2005-2020	Male	8	0.615086	0.986842	0.0131579	0.615086	14.3438	23.3199
Tursiops truncatus	2005-2020	Male	9	0.606993	1	0	0.606993	13.7287	22.6175
Tursiops truncatus	2005-2020	Male	10	0.606993	0.985294	0.0147059	0.606993	13.1217	21.6175
Tursiops truncatus	2005-2020	Male	11	0.598066	0.984375	0.015625	0.598066	12.5147	20.9253
Tursiops truncatus	2005-2020	Male	12	0.588722	0.984615	0.0153846	0.588722	11.9166	20.2415
Tursiops truncatus	2005-2020	Male	13	0.579664	0.984848	0.0151515	0.579664	11.3279	19.5422
Tursiops truncatus	2005-2020	Male	14	0.570882	0.984375	0.015625	0.570882	10.7482	18.8274
Tursiops truncatus	2005-2020	Male	15	0.561962	0.969683	0.0303172	0.549865	10.1774	18.1104
Tursiops truncatus	2005-2020	Male	16	0.544924	0.983871	0.016129	0.544924	9.6275	17.6676
Tursiops truncatus	2005-2020	Male	17	0.536135	1	0	0.536135	9.08257	16.9408
Tursiops truncatus	2005-2020	Male	18	0.536135	1	0	0.536135	8.54644	15.9408
Tursiops truncatus	2005-2020	Male	19	0.536135	0.980392	0.0196078	0.536135	8.0103	14.9408
Tursiops truncatus	2005-2020	Male	20	0.525623	0.980769	0.0192308	0.525623	7.47417	14.2196
Tursiops truncatus	2005-2020	Male	21	0.515515	0.918261	0.0817391	0.49646	6.94854	13.4788
Tursiops truncatus	2005-2020	Male	22	0.473377	1	0	0.473377	6.45208	13.6299
Tursiops truncatus	2005-2020	Male	23	0.473377	0.95122	0.0487805	0.464795	5.97871	12.6299
Tursiops truncatus	2005-2020	Male	24	0.450285	0.918124	0.081876	0.431836	5.51391	12.2454
Tursiops truncatus	2005-2020	Male	25	0.413418	1	0	0.413418	5.08208	12.2928
Tursiops truncatus	2005-2020	Male	26	0.413418	0.96875	0.03125	0.413418	4.66866	11.2928
Tursiops truncatus	2005-2020	Male	27	0.400499	0.874	0.126	0.372234	4.25524	10.6249
Tursiops truncatus	2005-2020	Male	28	0.350036	1	0	0.350036	3.88301	11.0932
Tursiops truncatus	2005-2020	Male	29	0.350036	0.941176	0.0588235	0.350036	3.53297	10.0932
Tursiops truncatus	2005-2020	Male	30	0.329445	0.9375	0.0625	0.329445	3.18293	9.66149
Tursiops truncatus	2005-2020	Male	31	0.308855	0.9375	0.0625	0.308855	2.85349	9.23893
Tursiops truncatus	2005-2020	Male	32	0.289552	0.933333	0.0666667	0.289552	2.54463	8.78819
Tursiops truncatus	2005-2020	Male	33	0.270248	0.9375	0.0625	0.270248	2.25508	8.34449
Tursiops truncatus	2005-2020	Male	34	0.253358	0.875	0.125	0.236135	1.98483	7.83412
Tursiops truncatus	2005-2020	Male	35	0.221688	1	0	0.221688	1.7487	7.88811
Tursiops truncatus	2005-2020	Male	36	0.221688	1	0	0.221688	1.52701	6.88811
Tursiops truncatus	2005-2020	Male	37	0.221688	0.923077	0.0769231	0.221688	1.30532	5.88811
Tursiops truncatus	2005-2020	Male	38	0.204635	1	0	0.204635	1.08364	5.29545
Tursiops truncatus	2005-2020	Male	39	0.204635	0.909091	0.0909091	0.204635	0.879001	4.29545
Tursiops truncatus	2005-2020	Male	40	0.186032	1	0	0.186032	0.674366	3.625
Tursiops truncatus	2005-2020	Male	41	0.186032	0.875	0.125	0.186032	0.488334	2.625
Tursiops truncatus	2005-2020	Male	42	0.162778	0.857143	0.142857	0.162778	0.302302	1.85714
Tursiops truncatus	2005-2020	Male	43	0.139524	0	1	0.139524	0.139524	1
